# Supplementary material for: Short-term association among meteorological variation, outdoor air pollution and acute bronchiolitis in children in a subtropical setting
Source: HighWire-hosted journal article supplement (doi:10.1136/thoraxjnl-2020-215488), 2021-01-20
Supplement: thoraxjnl-2020-215488supp001_data_supplement.pdf [file thoraxjnl-2020-215488supp001_data_supplement.pdf]

## Appendix

### Short-term Association among Meteorological Variation, Outdoor Air Pollution and Acute Bronchiolitis in Children in a Subtropical Setting

Shuk Yu Leung<sup>1,2</sup>, Steven Yuk Fai Lau<sup>2</sup>, Kwok Ka Li<sup>1</sup>, Kirran N. Mohammad<sup>2</sup>, Paul Kay Sheung Chan<sup>3,4</sup>, Ka Chun Chong<sup>2,5</sup>

<sup>1</sup> Department of Paediatrics, Kwong Wah Hospital, Hong Kong, China

<sup>2</sup> School of Public Health and Primary Care, The Chinese University of Hong Kong, Hong Kong, China

<sup>3</sup> Department of Microbiology, Faculty of Medicine, The Chinese University of Hong Kong, Hong Kong Special Administrative Region, China

<sup>4</sup> Stanley Ho Centre for Emerging Infectious Diseases, Faculty of Medicine, The Chinese University of Hong Kong, Hong Kong Special Administrative Region, China

<sup>5</sup> Clinical Trials and Biostatistics Laboratory, Shenzhen Research Institute, The Chinese University of Hong Kong, China

**Correspondence to** Dr. Ka Chun Chong, School of Public Health and Primary Care, The Chinese University of Hong Kong, Hong Kong, China; [marc@cuhk.edu.hk](mailto:marc@cuhk.edu.hk); (852) 2252 8716

**Table of contents**

- A. Pearson correlation coefficient between the meteorological factors and pollutants during the study period (2008 - 2017)
- B. Sensitivity Analysis: Cumulative adjusted relative risks (ARRs) of rainfall using different sets of cutoffs
- C. Sensitivity Analysis: Cumulative adjusted relative risks (ARRs) of meteorological parameters at different parameter settings
- D. Sensitivity Analysis: Cumulative adjusted relative risks (ARRs) of pollutants at different parameter settings
- E. R outputs of the modelling analysis

**A. Pearson correlation coefficient between the meteorological factors and pollutants during the study period (2008 - 2017)**

|                             | <b>Ambient Temperature</b> | <b>Apparent Temperature</b> | <b>Relative Humidity</b> | <b>Vapour Pressure</b> | <b>Rainfall</b> | <b>NO<sub>2</sub></b> | <b>log(SO<sub>2</sub>)</b> | <b>O<sub>3</sub></b> | <b>log(PM<sub>10</sub>)</b> |
|-----------------------------|----------------------------|-----------------------------|--------------------------|------------------------|-----------------|-----------------------|----------------------------|----------------------|-----------------------------|
| <b>Ambient Temperature</b>  |                            | 0.973                       | 0.227                    | 0.942                  | 0.121           | -0.337                | 0.023                      | -0.093               | -0.468                      |
| <b>Apparent Temperature</b> |                            |                             | 0.281                    | 0.939                  | 0.105           | -0.250                | 0.097                      | -0.199               | -0.476                      |
| <b>Relative Humidity</b>    |                            |                             |                          | 0.506                  | 0.352           | -0.329                | -0.384                     | -0.439               | -0.515                      |
| <b>Vapour Pressure</b>      |                            |                             |                          |                        | 0.239           | -0.439                | -0.095                     | -0.277               | -0.619                      |
| <b>Rainfall</b>             |                            |                             |                          |                        |                 | -0.133                | -0.150                     | -0.191               | -0.309                      |
| <b>NO<sub>2</sub></b>       |                            |                             |                          |                        |                 |                       | 0.576                      | 0.191                | 0.697                       |
| <b>log(SO<sub>2</sub>)</b>  |                            |                             |                          |                        |                 |                       |                            | -0.068               | 0.417                       |
| <b>O<sub>3</sub></b>        |                            |                             |                          |                        |                 |                       |                            |                      | 0.566                       |
| <b>log(PM<sub>10</sub>)</b> |                            |                             |                          |                        |                 |                       |                            |                      |                             |

## B. Sensitivity Analysis: Cumulative adjusted relative risks (ARRs) of rainfall using different sets of cutoffs

- **Model 1:** (i) Rainfall = 0; (ii)  $0 < \text{Rainfall} \leq 95^{\text{th}}$  percentile; and (iii) Rainfall  $> 95^{\text{th}}$  percentile
- **Model 2:** (i) Rainfall = 0; (ii)  $0 < \text{Rainfall} \leq 90^{\text{th}}$  percentile; and (iii) Rainfall  $> 90^{\text{th}}$  percentile
- **Model 3:** (i) Rainfall = 0; (ii)  $0 < \text{Rainfall} \leq 97.5^{\text{th}}$  percentile; and (iii) Rainfall  $> 97.5^{\text{th}}$  percentile
- **Model 4:** (i)  $0 \leq \text{Rainfall} \leq 1$ ; (ii)  $1 < \text{Rainfall} \leq 97.5^{\text{th}}$  percentile; and (iii) Rainfall  $> 97.5^{\text{th}}$  percentile
- **Model 5:** (i)  $0 \leq \text{Rainfall} \leq 5$ ; (ii)  $5 < \text{Rainfall} \leq 97.5^{\text{th}}$  percentile; and (iii) Rainfall  $> 97.5^{\text{th}}$  percentile

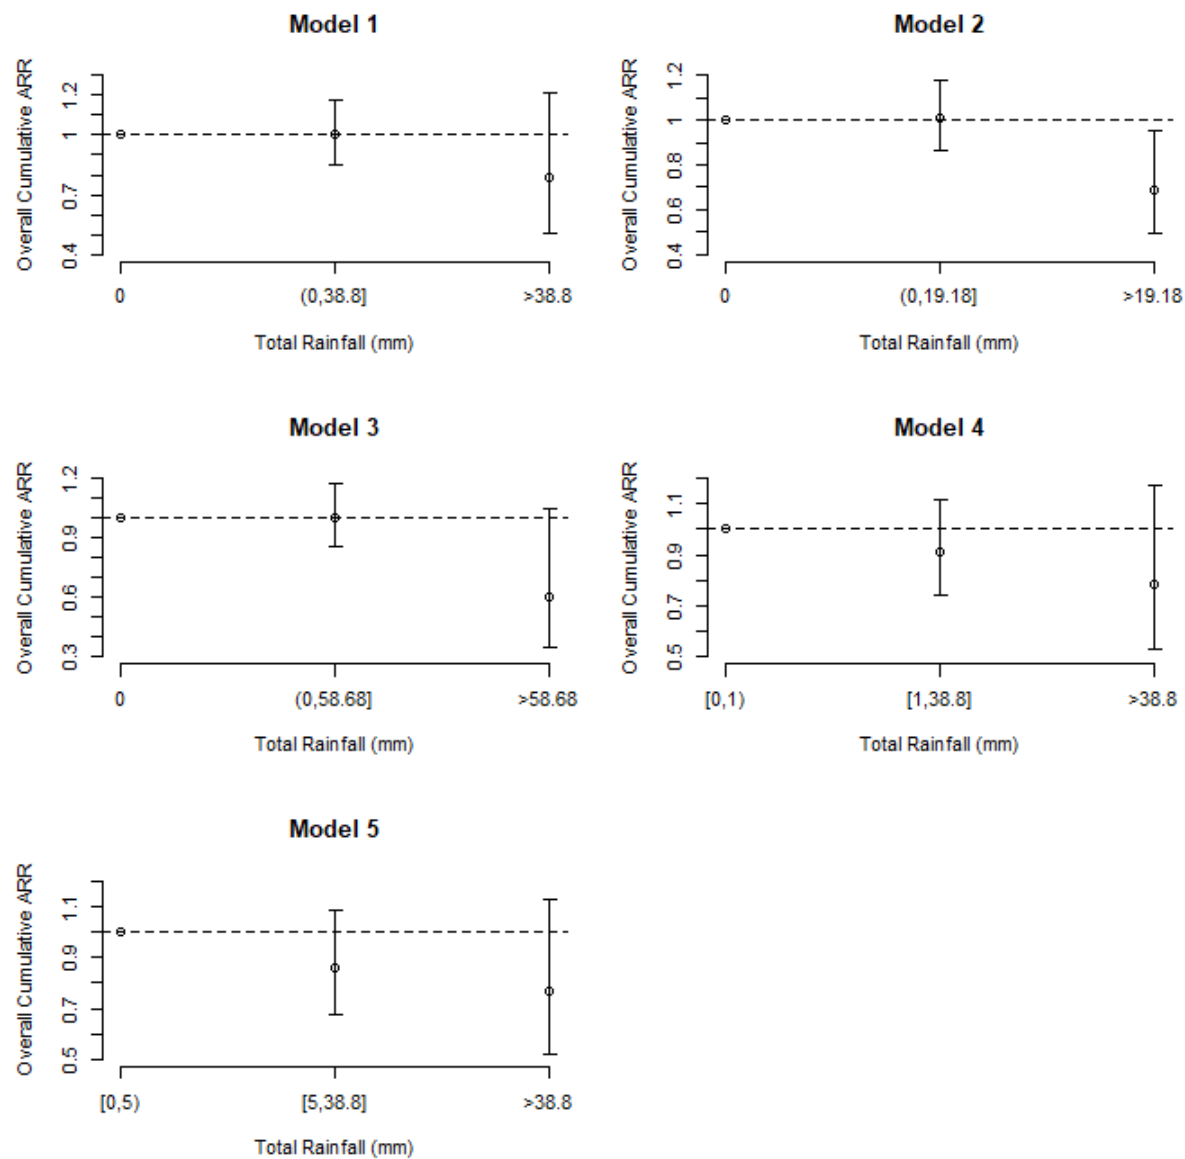

**C. Sensitivity Analysis: Cumulative adjusted relative risks (ARRs) of meteorological parameters: (a) ambient temperature, (b) apparent temperature, (c) relative humidity, (d) vapour pressure, and (e) total rainfall at different parameter settings**

- **Model 1:** df for the meteorological parameters = 3; df for the pollutants = 4; df for lag = 4, df for day of study per year = 7
- **Model 2:** df for the meteorological parameters = 2; df for the pollutants = 4; df for lag = 4, df for day of study per year = 7
- **Model 3:** df for the meteorological parameters = 5; df for the pollutants = 4; df for lag = 4, df for day of study per year = 7
- **Model 4:** df for the meteorological parameters = 3; df for the pollutants = 3; df for lag = 4, df for day of study per year = 7
- **Model 5:** df for the meteorological parameters = 3; df for the pollutants = 5; df for lag = 4, df for day of study per year = 7
- **Model 6:** df for the meteorological parameters = 3; df for the pollutants = 4; df for lag = 3, df for day of study per year = 7
- **Model 7:** df for the meteorological parameters = 3; df for the pollutants = 4; df for lag = 5, df for day of study per year = 7
- **Model 8:** df for the meteorological parameters = 3; df for the pollutants = 4; df for lag = 4, df for day of study per year = 6
- **Model 9:** df for the meteorological parameters = 3; df for the pollutants = 4; df for lag = 4, df for day of study per year = 8

**(a) Ambient Temperature (ref. = 24.8°C)**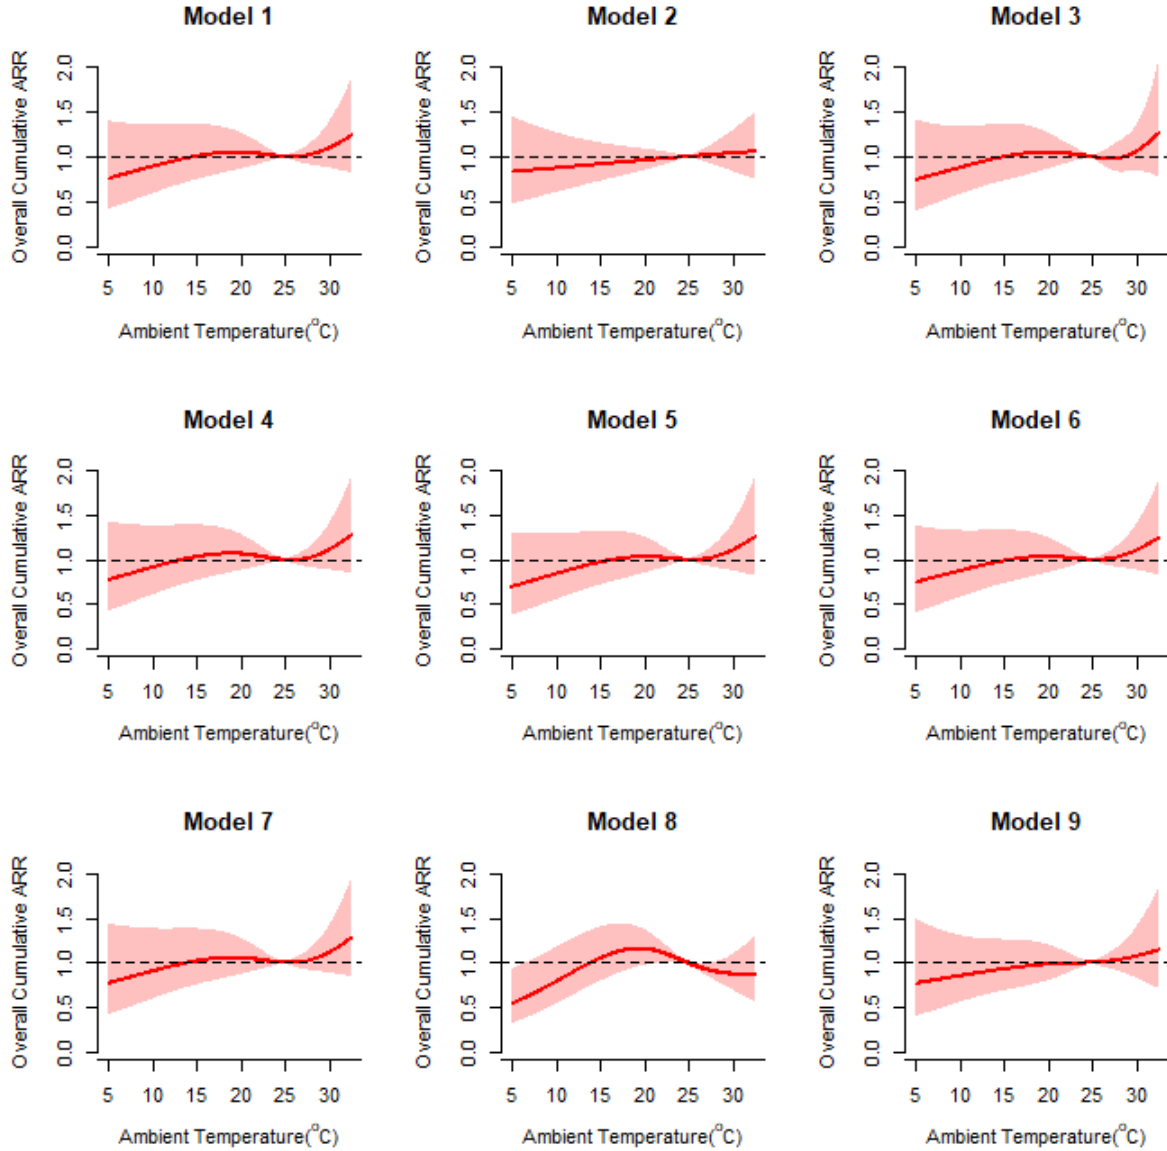

**(b) Apparent Temperature (ref. = 23.6°C)**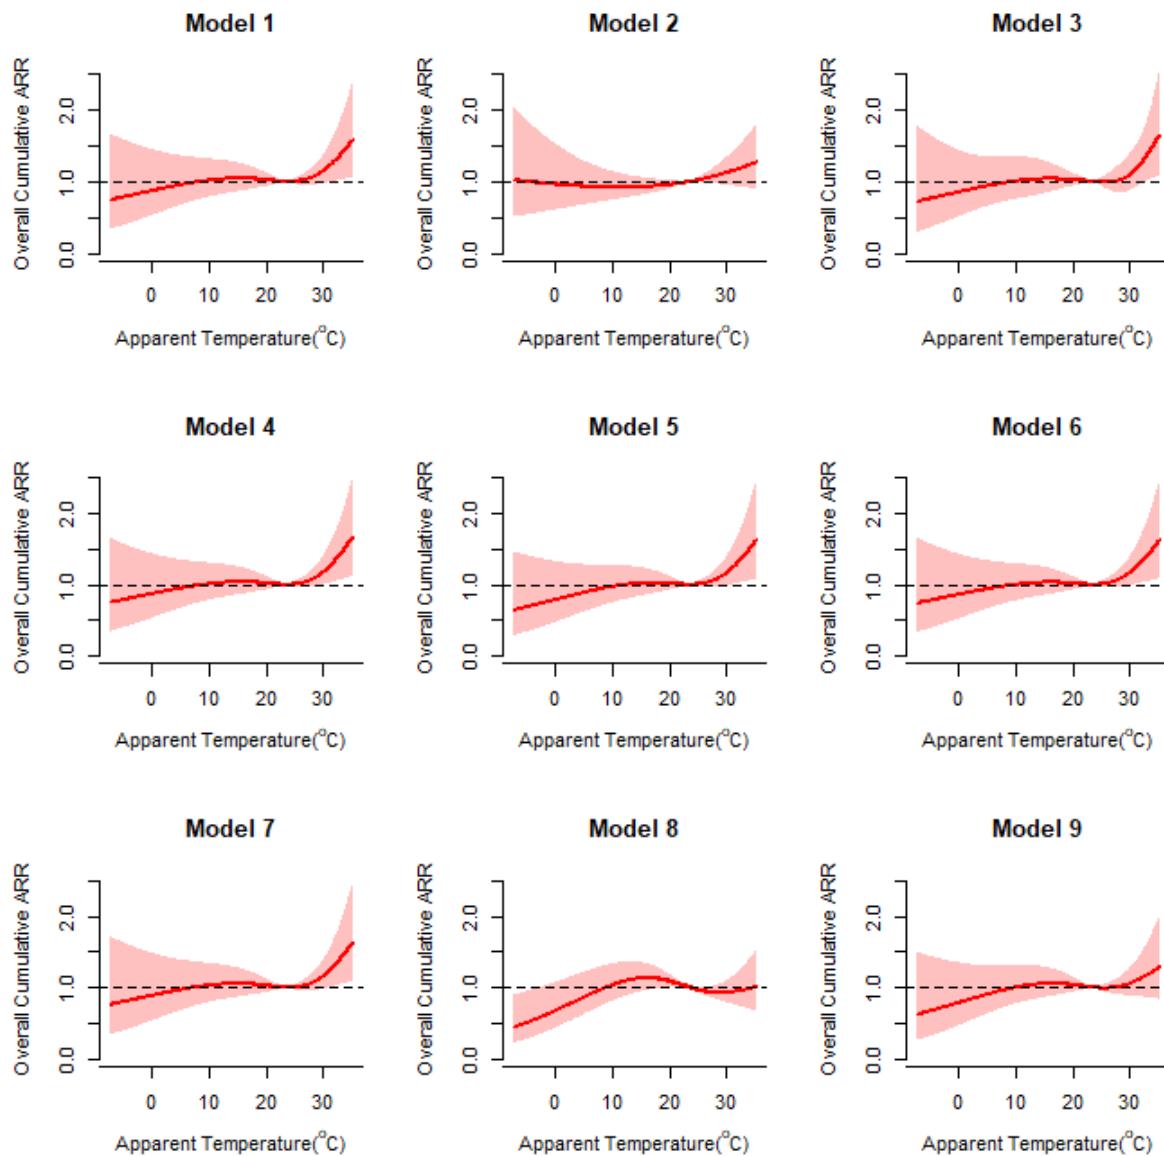

**(c) Relative Humidity (ref. = 79.0%)**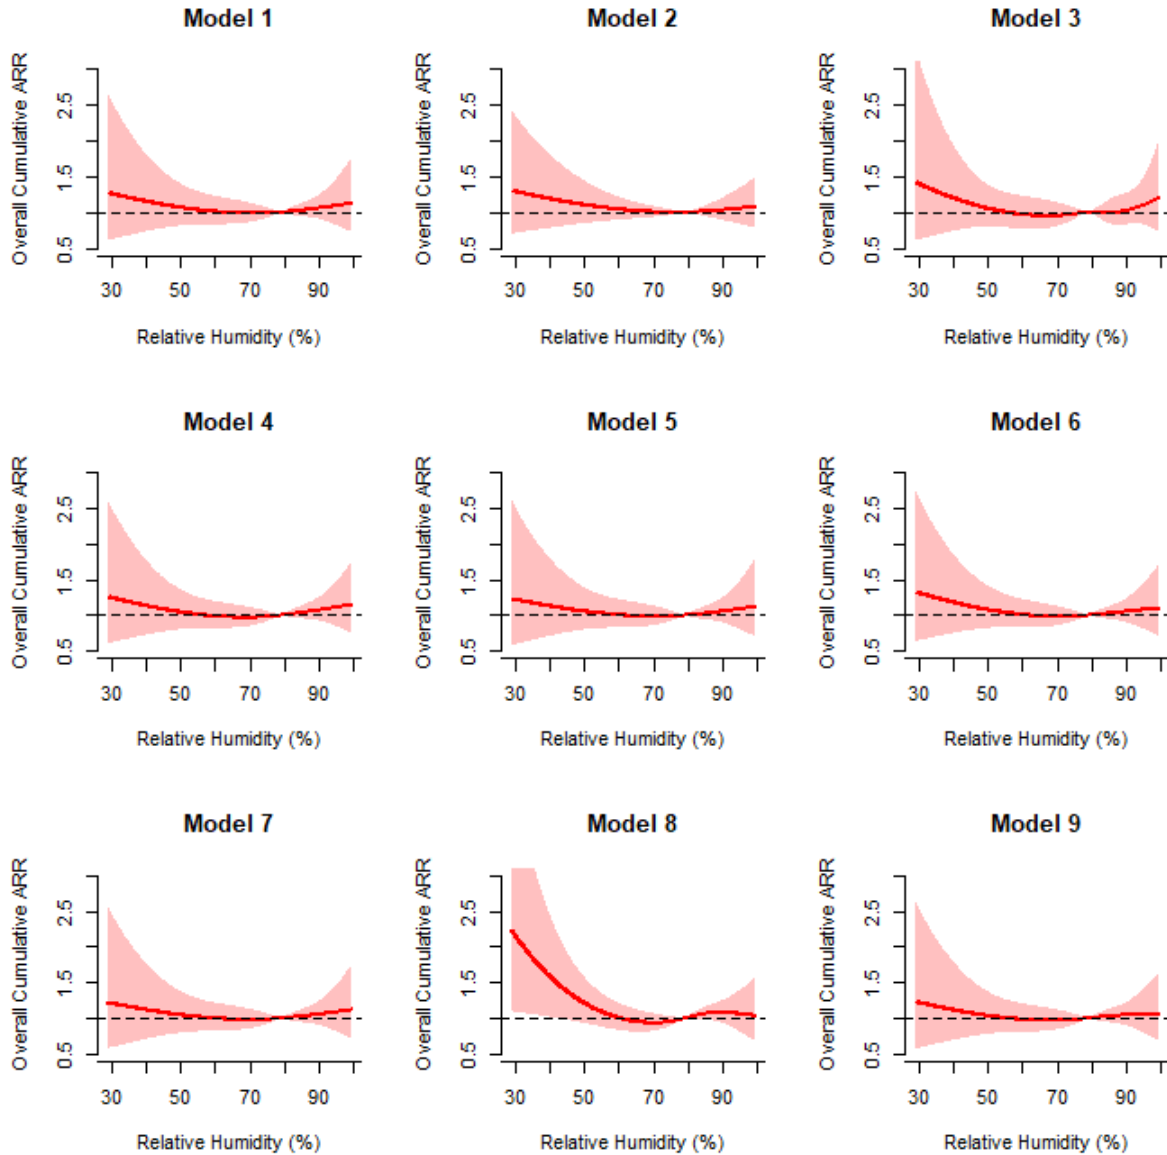



**(d) Vapour Pressure (ref. = 24.7 hPa)**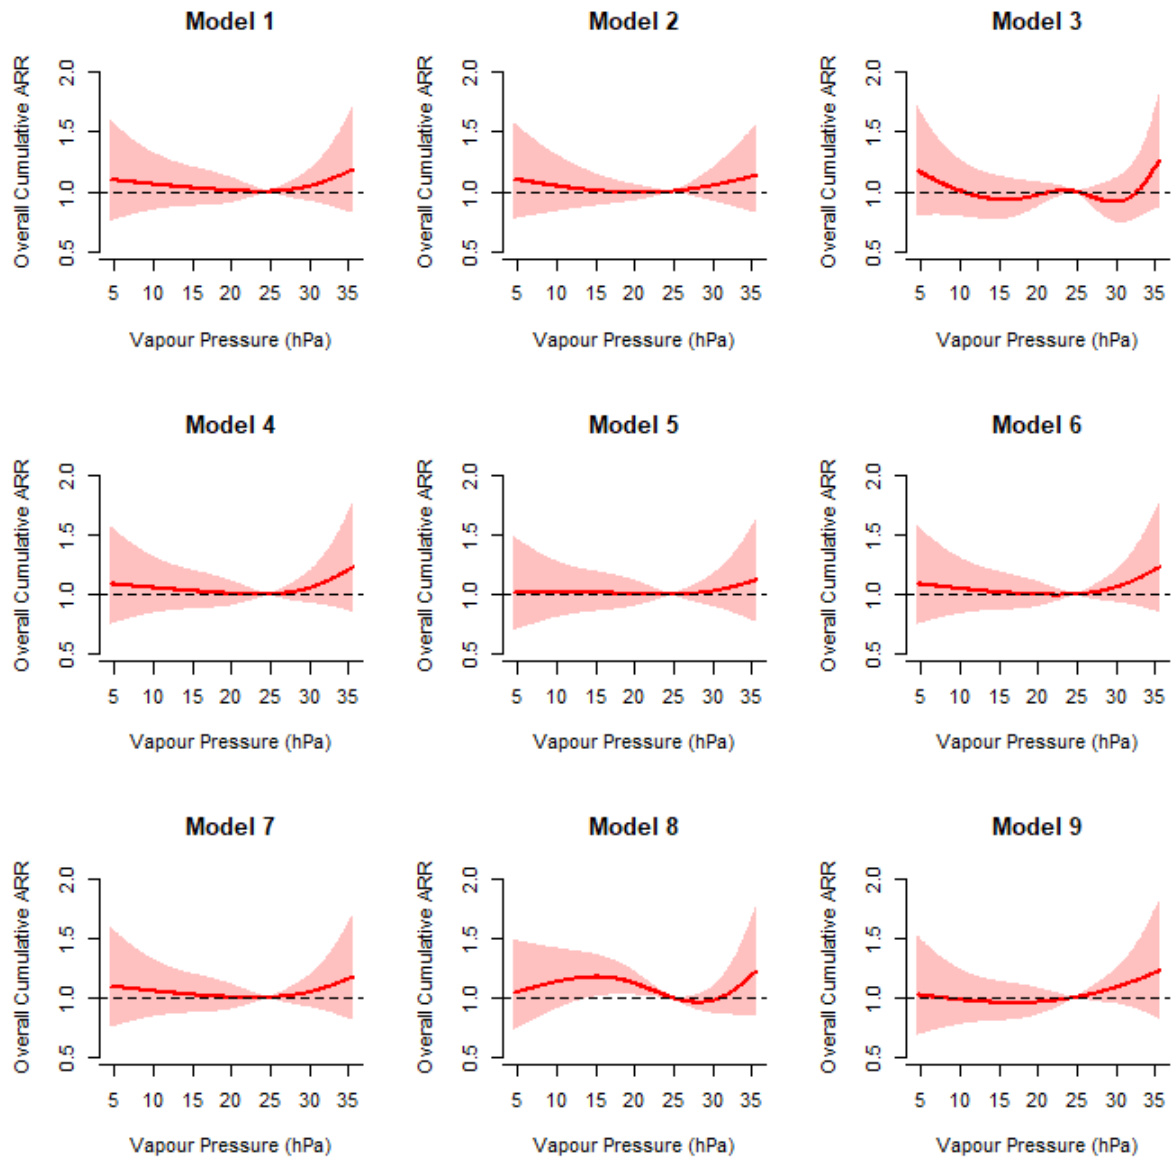

(e) Rainfall (ref. = 0)

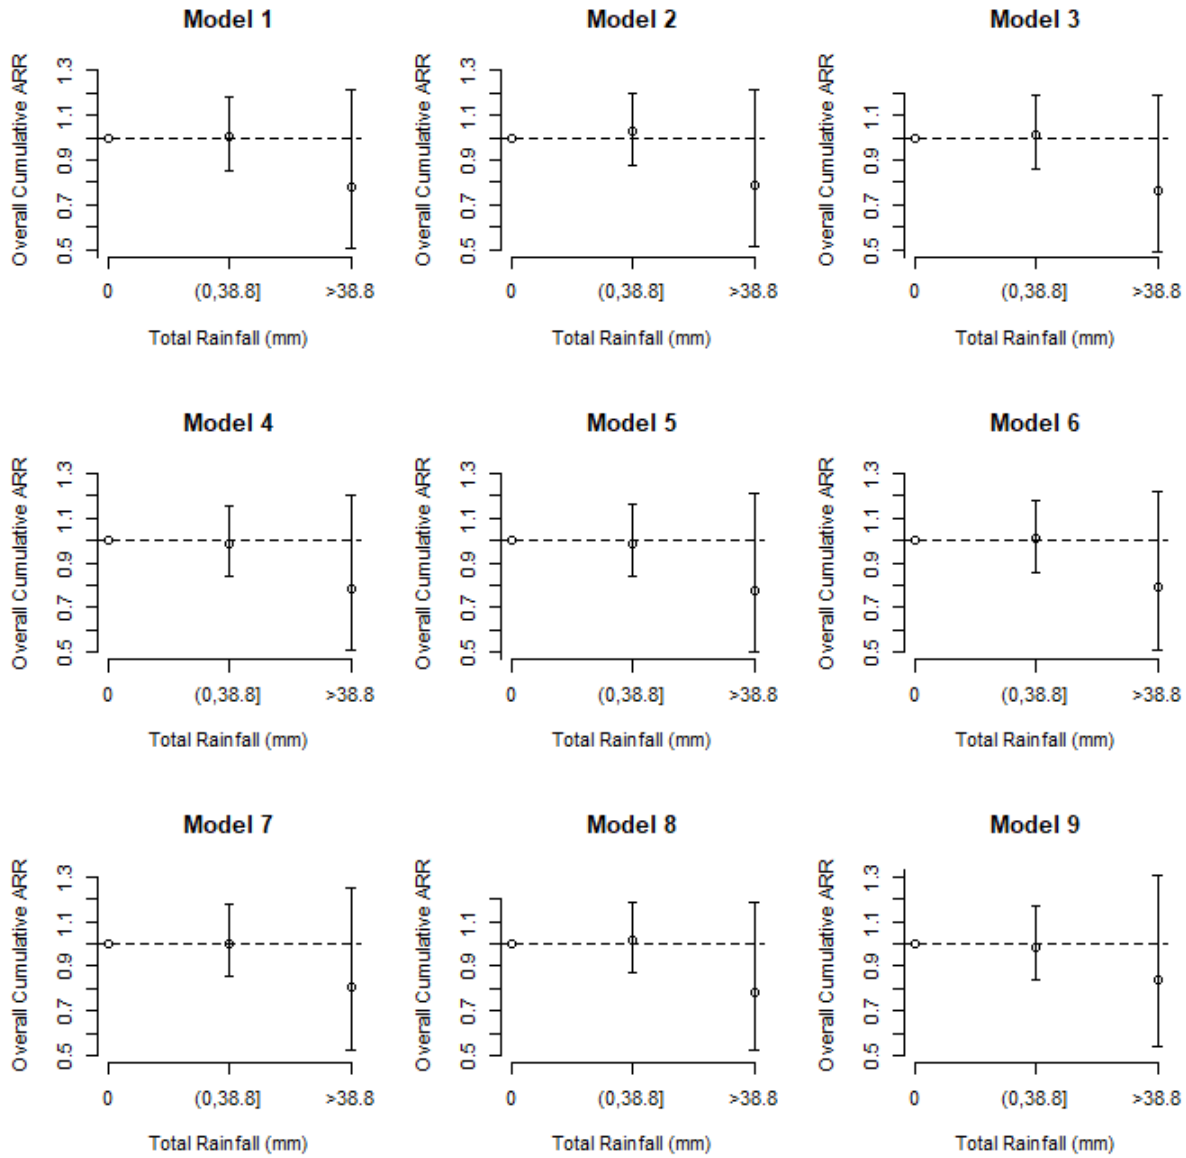

**D. Sensitivity Analysis: Cumulative adjusted relative risks (ARRs) of pollutants: (a) NO<sub>2</sub>, (b) PM<sub>10</sub>, (c) O<sub>3</sub>, and (d) SO<sub>2</sub> at different parameter settings**

- **Model 1:** df for the meteorological parameters = 3; df for the pollutants = 4; df for lag = 4, df for day of study per year = 7
- **Model 2:** df for the meteorological parameters = 3; df for the pollutants = 4; df for lag = 4, df for day of study per year = 7
- **Model 3:** df for the meteorological parameters = 5; df for the pollutants = 4; df for lag = 4, df for day of study per year = 7
- **Model 4:** df for the meteorological parameters = 3; df for the pollutants = 3; df for lag = 4, df for day of study per year = 7
- **Model 5:** df for the meteorological parameters = 3; df for the pollutants = 5; df for lag = 4, df for day of study per year = 7
- **Model 6:** df for the meteorological parameters = 3; df for the pollutants = 4; df for lag = 3, df for day of study per year = 7
- **Model 7:** df for the meteorological parameters = 3; df for the pollutants = 4; df for lag = 5, df for day of study per year = 7
- **Model 8:** df for the meteorological parameters = 3; df for the pollutants = 4; df for lag = 4, df for day of study per year = 6
- **Model 9:** df for the meteorological parameters = 3; df for the pollutants = 4; df for lag = 4, df for day of study per year = 8

(a) NO<sub>2</sub> (ref. = 29.0 µg/m<sup>3</sup>)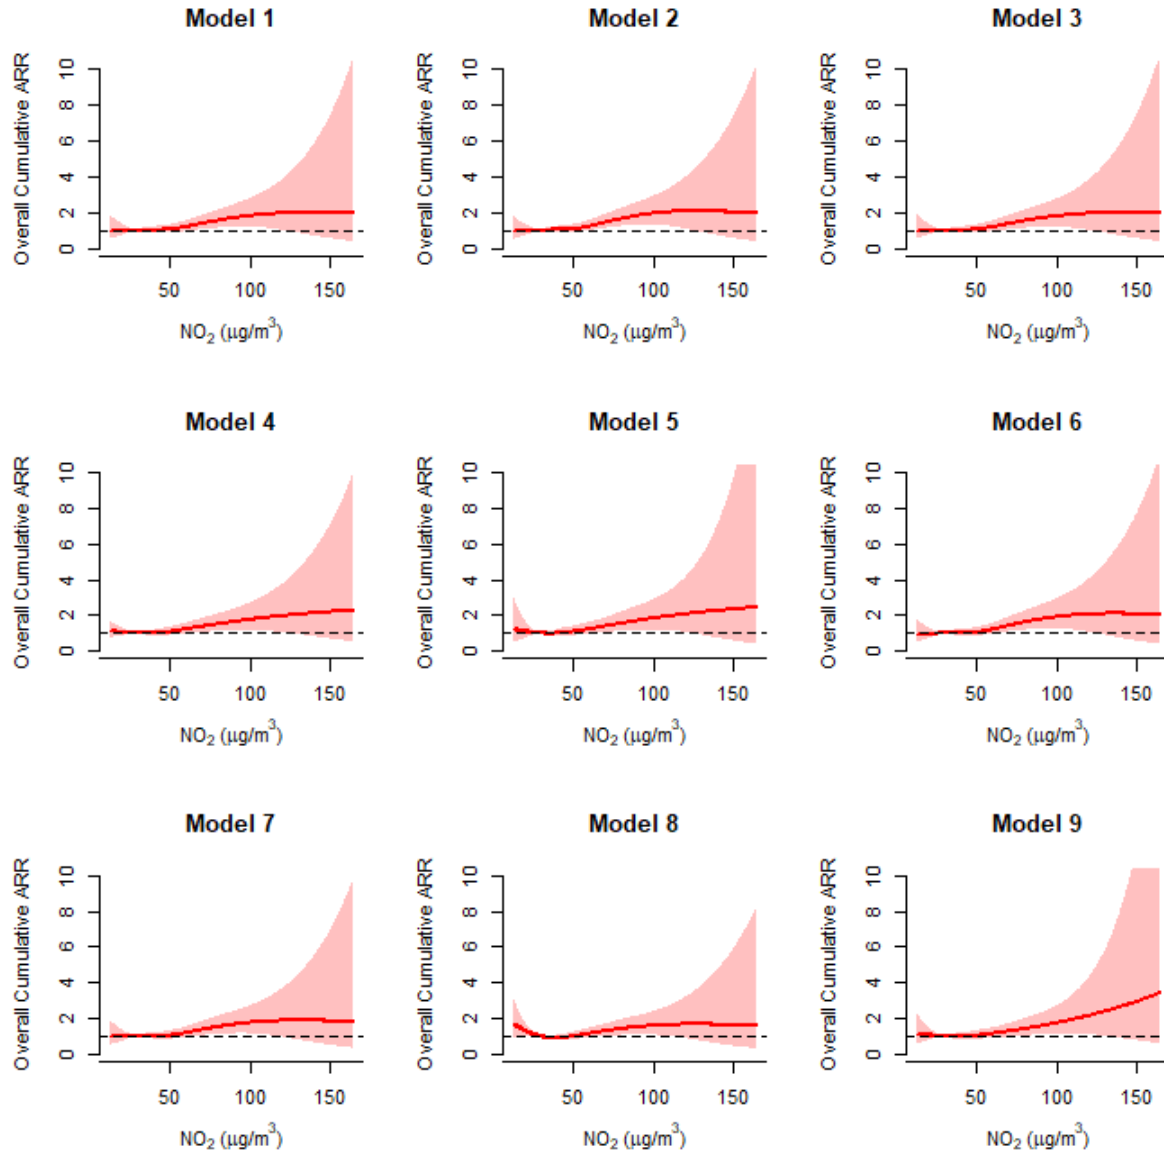

**(b)  $\log(\text{PM}_{10})$  (ref. =  $\log(15.0 \mu\text{g}/\text{m}^3)$ )**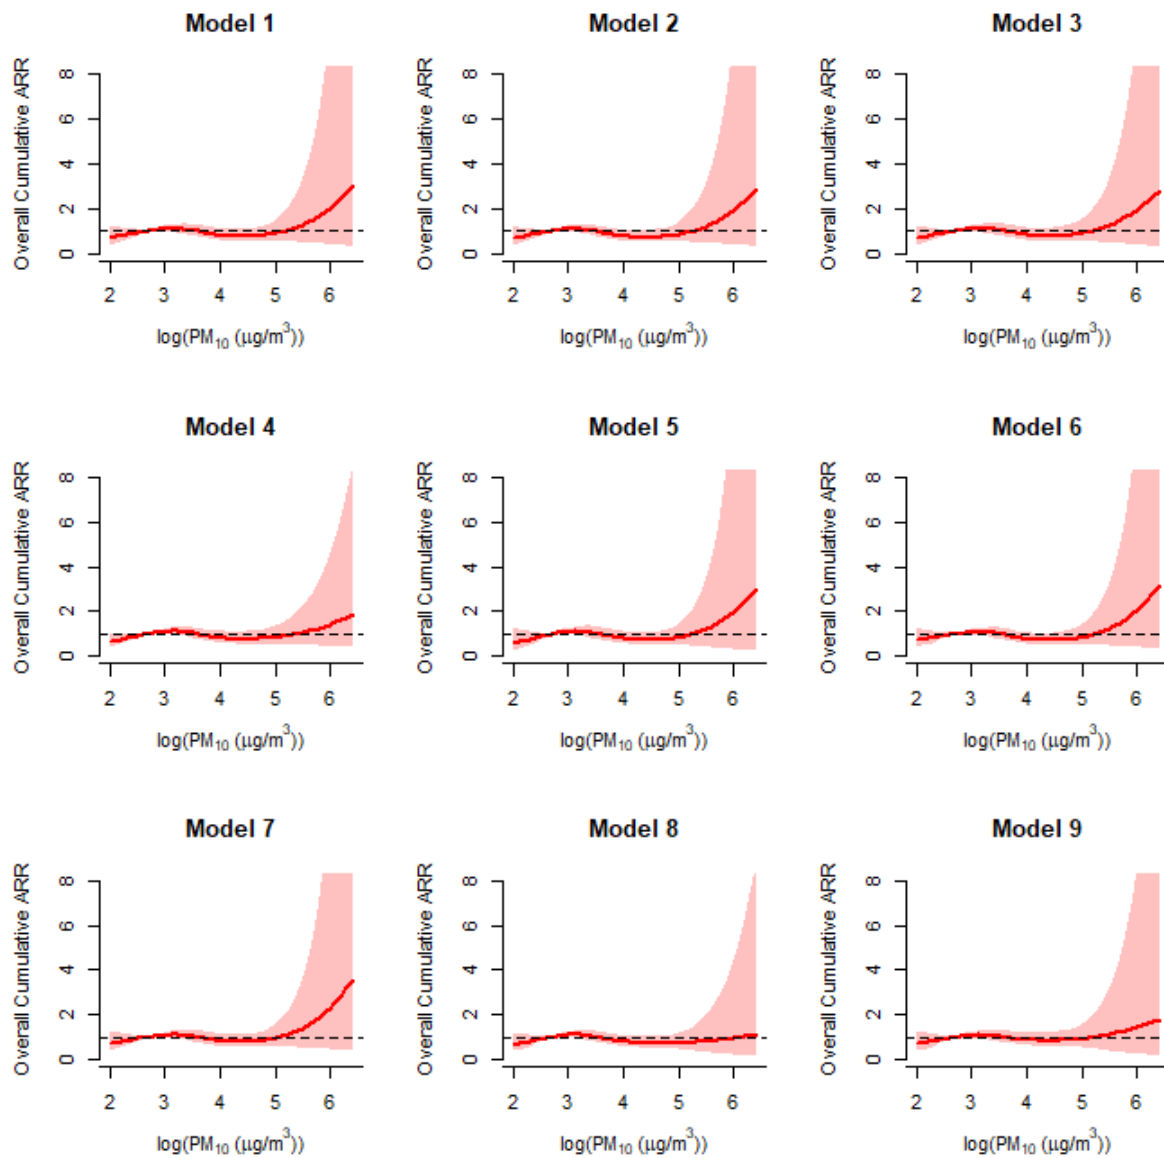

(c) O<sub>3</sub> (ref. = 12.6 µg/m<sup>3</sup>)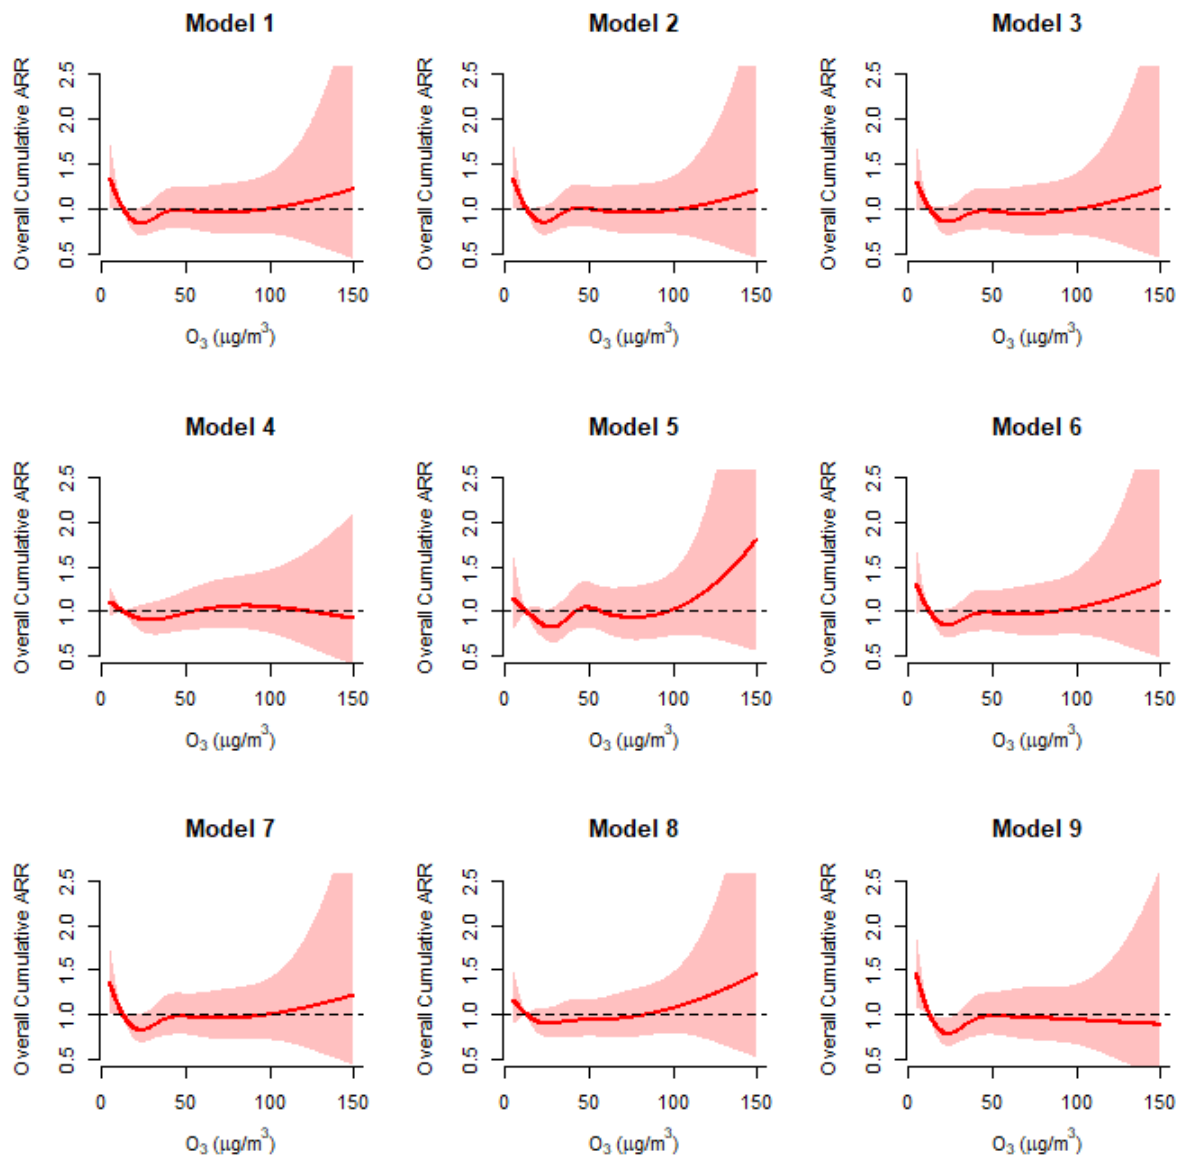

**(d)  $\log(\text{SO}_2)$  (ref. =  $\log(5.2 \mu\text{g}/\text{m}^3)$ )**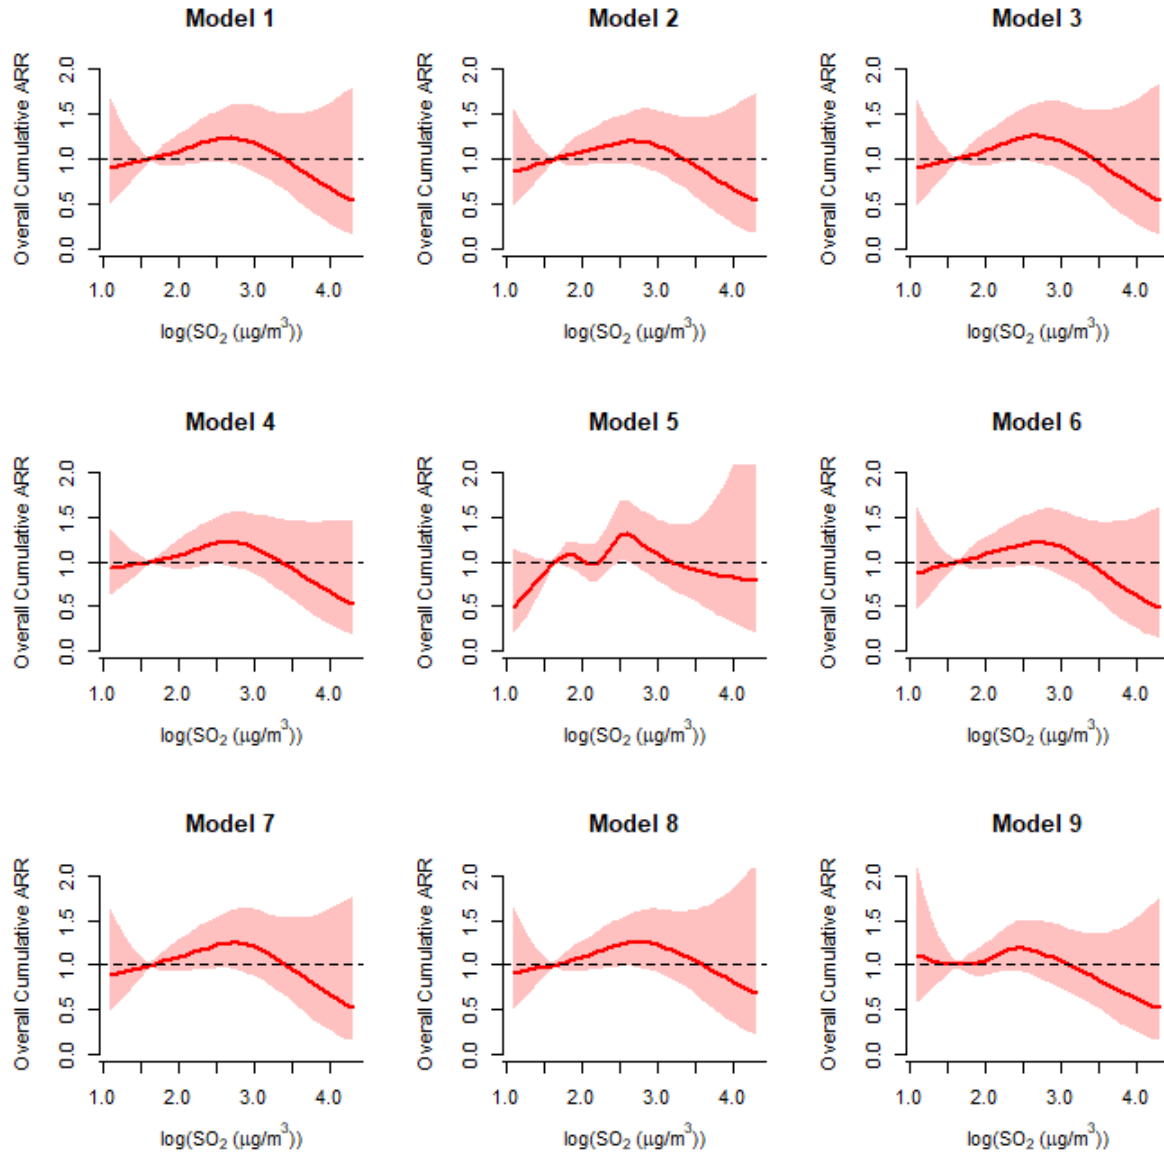

## E. R outputs of the modelling analysis

**1. Primary model:**  $\log[E(Y_t)] = \alpha + \text{cb}(\text{temperature}_t) + \text{cb}(\text{relative humidity}_t) + \text{cb}(\text{factor}(\text{rainfall}_t)) + \text{cb}(\text{NO}_{2_t}) + \text{cb}(\log(\text{SO}_{2_t})) + \text{cb}(\text{O}_{3_t}) + \text{cb}(\log(\text{PM}_{10_t})) + \text{cb}(\text{factor}(\text{Holiday}_t)) + \text{ns}(\text{DOS}_t, \text{df} = 7 \text{ per year}) + \text{factor}(\text{DOW}_t) + s(\sqrt{\text{influenza}_t}, k = 7)$

Family: quasipoisson

Link function: log

Formula:

```
ad ~ temp.cb + humid.cb + rainfall.cb + o3.cb + so2.cb + no2.cb +
      pm10.cb + holiday.cb + factor(dow) + ns(dos, df = 10 * trend_df) +
      s(sqrt(influ), k = 7)
```

Parametric coefficients:

|                  | Estimate   | Std. Error | t value | Pr(> t )   |
|------------------|------------|------------|---------|------------|
| (Intercept)      | 1.4512548  | 0.7160001  | 2.027   | 0.042750 * |
| temp.cbv1.11     | 0.0439784  | 0.0418318  | 1.051   | 0.293187   |
| temp.cbv1.12     | -0.0878345 | 0.0390152  | -2.251  | 0.024430 * |
| temp.cbv1.13     | 0.0446216  | 0.0618343  | 0.722   | 0.470570   |
| temp.cbv1.14     | -0.0034920 | 0.0423107  | -0.083  | 0.934228   |
| temp.cbv2.11     | 0.1231761  | 0.1142025  | 1.079   | 0.280852   |
| temp.cbv2.12     | -0.1643616 | 0.1065041  | -1.543  | 0.122864   |
| temp.cbv2.13     | 0.1794677  | 0.1601544  | 1.121   | 0.262540   |
| temp.cbv2.14     | -0.0698977 | 0.1133739  | -0.617  | 0.537590   |
| temp.cbv3.11     | 0.0137331  | 0.0511297  | 0.269   | 0.788258   |
| temp.cbv3.12     | -0.1119861 | 0.0500760  | -2.236  | 0.025394 * |
| temp.cbv3.13     | 0.0684730  | 0.0706839  | 0.969   | 0.332752   |
| temp.cbv3.14     | 0.0674186  | 0.0498300  | 1.353   | 0.176153   |
| humid.cbv1.11    | -0.0266661 | 0.0328741  | -0.811  | 0.417331   |
| humid.cbv1.12    | 0.0259349  | 0.0323173  | 0.803   | 0.422314   |
| humid.cbv1.13    | 0.0136069  | 0.0448957  | 0.303   | 0.761849   |
| humid.cbv1.14    | -0.0470236 | 0.0330892  | -1.421  | 0.155373   |
| humid.cbv2.11    | -0.0812557 | 0.1074348  | -0.756  | 0.449505   |
| humid.cbv2.12    | 0.1865052  | 0.1062710  | 1.755   | 0.079349 . |
| humid.cbv2.13    | -0.0743799 | 0.1565142  | -0.475  | 0.634655   |
| humid.cbv2.14    | -0.1123834 | 0.1107212  | -1.015  | 0.310171   |
| humid.cbv3.11    | -0.0198497 | 0.0412145  | -0.482  | 0.630106   |
| humid.cbv3.12    | 0.0941500  | 0.0406179  | 2.318   | 0.020511 * |
| humid.cbv3.13    | -0.0571965 | 0.0556244  | -1.028  | 0.303899   |
| humid.cbv3.14    | 0.0217260  | 0.0391004  | 0.556   | 0.578488   |
| rainfall.cbv1.11 | -0.0022131 | 0.0110607  | -0.200  | 0.841422   |
| rainfall.cbv1.12 | -0.0047411 | 0.0115397  | -0.411  | 0.681211   |
| rainfall.cbv1.13 | 0.0032760  | 0.0145790  | 0.225   | 0.822220   |
| rainfall.cbv1.14 | 0.0045150  | 0.0105962  | 0.426   | 0.670061   |
| rainfall.cbv2.11 | -0.0104598 | 0.0280257  | -0.373  | 0.709005   |
| rainfall.cbv2.12 | -0.0495716 | 0.0304926  | -1.626  | 0.104106   |
| rainfall.cbv2.13 | 0.0254501  | 0.0361916  | 0.703   | 0.481977   |
| rainfall.cbv2.14 | -0.0359519 | 0.0268185  | -1.341  | 0.180151   |
| o3.cbv1.11       | 0.0345359  | 0.0298613  | 1.157   | 0.247540   |
| o3.cbv1.12       | -0.0307839 | 0.0298265  | -1.032  | 0.302099   |
| o3.cbv1.13       | -0.0591781 | 0.0410856  | -1.440  | 0.149856   |
| o3.cbv1.14       | 0.0178601  | 0.0293947  | 0.608   | 0.543494   |
| o3.cbv2.11       | 0.0179539  | 0.0389989  | 0.460   | 0.645280   |
| o3.cbv2.12       | 0.0066618  | 0.0398056  | 0.167   | 0.867098   |
| o3.cbv2.13       | -0.0294685 | 0.0524620  | -0.562  | 0.574350   |
| o3.cbv2.14       | -0.0338190 | 0.0377101  | -0.897  | 0.369880   |
| o3.cbv3.11       | 0.0729922  | 0.0746161  | 0.978   | 0.328026   |
| o3.cbv3.12       | -0.0630899 | 0.0762029  | -0.828  | 0.407773   |
| o3.cbv3.13       | -0.1670266 | 0.0999883  | -1.670  | 0.094919 . |
| o3.cbv3.14       | 0.0555581  | 0.0730619  | 0.760   | 0.447053   |
| o3.cbv4.11       | 0.1574924  | 0.0703358  | 2.239   | 0.025210 * |
| o3.cbv4.12       | -0.1800452 | 0.0740213  | -2.432  | 0.015052 * |
| o3.cbv4.13       | -0.0433764 | 0.0938465  | -0.462  | 0.643963   |
| o3.cbv4.14       | 0.1376333  | 0.0706558  | 1.948   | 0.051503 . |
| so2.cbv1.11      | 0.0134665  | 0.0521547  | 0.258   | 0.796266   |
| so2.cbv1.12      | 0.0984224  | 0.0509775  | 1.931   | 0.053602 . |



|                               |            |           |        |              |
|-------------------------------|------------|-----------|--------|--------------|
| so2.cbv1.13                   | 0.0114321  | 0.0712974 | 0.160  | 0.872620     |
| so2.cbv1.14                   | -0.0912327 | 0.0503946 | -1.810 | 0.070326 .   |
| so2.cbv2.11                   | 0.0464193  | 0.0474932 | 0.977  | 0.328445     |
| so2.cbv2.12                   | 0.0811822  | 0.0475452 | 1.707  | 0.087824 .   |
| so2.cbv2.13                   | -0.0280440 | 0.0639681 | -0.438 | 0.661120     |
| so2.cbv2.14                   | -0.0241849 | 0.0459626 | -0.526 | 0.598792     |
| so2.cbv3.11                   | 0.0549618  | 0.1204914 | 0.456  | 0.648313     |
| so2.cbv3.12                   | 0.2331202  | 0.1208678 | 1.929  | 0.053847 .   |
| so2.cbv3.13                   | -0.1215267 | 0.1657625 | -0.733 | 0.463524     |
| so2.cbv3.14                   | -0.1651787 | 0.1167885 | -1.414 | 0.157352     |
| so2.cbv4.11                   | 0.0026564  | 0.0769013 | 0.035  | 0.972447     |
| so2.cbv4.12                   | 0.0560959  | 0.0811260 | 0.691  | 0.489319     |
| so2.cbv4.13                   | -0.0973958 | 0.1074898 | -0.906 | 0.364949     |
| so2.cbv4.14                   | -0.0658722 | 0.0757302 | -0.870 | 0.384455     |
| no2.cbv1.11                   | -0.0616957 | 0.0527942 | -1.169 | 0.242642     |
| no2.cbv1.12                   | 0.0017939  | 0.0542495 | 0.033  | 0.973623     |
| no2.cbv1.13                   | -0.0009991 | 0.0715642 | -0.014 | 0.988862     |
| no2.cbv1.14                   | 0.1019180  | 0.0538348 | 1.893  | 0.058420 .   |
| no2.cbv2.11                   | 0.0188803  | 0.0511363 | 0.369  | 0.711990     |
| no2.cbv2.12                   | -0.0198304 | 0.0538109 | -0.369 | 0.712508     |
| no2.cbv2.13                   | 0.0673643  | 0.0691143 | 0.975  | 0.329787     |
| no2.cbv2.14                   | 0.0877127  | 0.0512704 | 1.711  | 0.087210 .   |
| no2.cbv3.11                   | -0.1785233 | 0.1212393 | -1.472 | 0.140980     |
| no2.cbv3.12                   | 0.1512279  | 0.1246071 | 1.214  | 0.224969     |
| no2.cbv3.13                   | 0.0090424  | 0.1643940 | 0.055  | 0.956138     |
| no2.cbv3.14                   | 0.2665555  | 0.1212167 | 2.199  | 0.027944 *   |
| no2.cbv4.11                   | -0.0688453 | 0.1023508 | -0.673 | 0.501221     |
| no2.cbv4.12                   | 0.1026636  | 0.1061544 | 0.967  | 0.333554     |
| no2.cbv4.13                   | 0.0079176  | 0.1451105 | 0.055  | 0.956490     |
| no2.cbv4.14                   | 0.1460566  | 0.1029970 | 1.418  | 0.156262     |
| pm10.cbv1.11                  | -0.0236306 | 0.0549739 | -0.430 | 0.667330     |
| pm10.cbv1.12                  | -0.0261759 | 0.0527177 | -0.497 | 0.619553     |
| pm10.cbv1.13                  | 0.1661722  | 0.0743066 | 2.236  | 0.025395 *   |
| pm10.cbv1.14                  | -0.1381865 | 0.0528898 | -2.613 | 0.009021 **  |
| pm10.cbv2.11                  | -0.0436518 | 0.0515316 | -0.847 | 0.397004     |
| pm10.cbv2.12                  | -0.0538285 | 0.0513311 | -1.049 | 0.294411     |
| pm10.cbv2.13                  | 0.0703806  | 0.0739057 | 0.952  | 0.341010     |
| pm10.cbv2.14                  | -0.1381750 | 0.0517831 | -2.668 | 0.007658 **  |
| pm10.cbv3.11                  | 0.0970854  | 0.1293034 | 0.751  | 0.452804     |
| pm10.cbv3.12                  | -0.2039492 | 0.1259097 | -1.620 | 0.105365     |
| pm10.cbv3.13                  | 0.3679024  | 0.1741204 | 2.113  | 0.034679 *   |
| pm10.cbv3.14                  | -0.2342362 | 0.1248315 | -1.876 | 0.060682 .   |
| pm10.cbv4.11                  | 0.0010267  | 0.1237157 | 0.008  | 0.993379     |
| pm10.cbv4.12                  | -0.0726563 | 0.1305394 | -0.557 | 0.577847     |
| pm10.cbv4.13                  | 0.2272455  | 0.1722491 | 1.319  | 0.187162     |
| pm10.cbv4.14                  | 0.0032430  | 0.1298638 | 0.025  | 0.980079     |
| holiday.cbv1.11               | 0.0195226  | 0.0139753 | 1.397  | 0.162523     |
| holiday.cbv1.12               | -0.0377211 | 0.0125888 | -2.996 | 0.002751 **  |
| holiday.cbv1.13               | -0.0213359 | 0.0183454 | -1.163 | 0.244904     |
| holiday.cbv1.14               | -0.0291242 | 0.0132594 | -2.196 | 0.028123 *   |
| factor(dow)2                  | -0.0587772 | 0.0221779 | -2.650 | 0.008080 **  |
| factor(dow)3                  | -0.0737656 | 0.0235202 | -3.136 | 0.001726 **  |
| factor(dow)4                  | -0.0442848 | 0.0237874 | -1.862 | 0.062731 .   |
| factor(dow)5                  | -0.0751847 | 0.0237134 | -3.171 | 0.001535 **  |
| factor(dow)6                  | -0.0899525 | 0.0235340 | -3.822 | 0.000135 *** |
| factor(dow)7                  | -0.0397347 | 0.0228790 | -1.737 | 0.082524 .   |
| ns(dos, df = 10 * trend_df)1  | 0.8616721  | 0.3091919 | 2.787  | 0.005351 **  |
| ns(dos, df = 10 * trend_df)2  | -0.0458647 | 0.4184533 | -0.110 | 0.912729     |
| ns(dos, df = 10 * trend_df)3  | 0.9980103  | 0.3923718 | 2.544  | 0.011017 *   |
| ns(dos, df = 10 * trend_df)4  | 0.3362908  | 0.4123966 | 0.815  | 0.414868     |
| ns(dos, df = 10 * trend_df)5  | 0.4138532  | 0.3848843 | 1.075  | 0.282331     |
| ns(dos, df = 10 * trend_df)6  | -0.2839202 | 0.4000807 | -0.710 | 0.477965     |
| ns(dos, df = 10 * trend_df)7  | -0.0838325 | 0.3579476 | -0.234 | 0.814841     |
| ns(dos, df = 10 * trend_df)8  | 1.2097265  | 0.3573797 | 3.385  | 0.000720 *** |
| ns(dos, df = 10 * trend_df)9  | -0.8398919 | 0.4148958 | -2.024 | 0.043012 *   |
| ns(dos, df = 10 * trend_df)10 | -0.1715906 | 0.4126791 | -0.416 | 0.677585     |
| ns(dos, df = 10 * trend_df)11 | -0.1609482 | 0.4416006 | -0.364 | 0.715533     |
| ns(dos, df = 10 * trend_df)12 | 0.6232963  | 0.3867686 | 1.612  | 0.107152     |
| ns(dos, df = 10 * trend_df)13 | -0.5633256 | 0.3747890 | -1.503 | 0.132918     |
| ns(dos, df = 10 * trend_df)14 | 1.3810768  | 0.3554162 | 3.886  | 0.000104 *** |
| ns(dos, df = 10 * trend_df)15 | 0.7007377  | 0.3546676 | 1.976  | 0.048262 *   |

```

ns(dos, df = 10 * trend_df)16 0.0950378 0.3999787 0.238 0.812200
ns(dos, df = 10 * trend_df)17 -0.7546348 0.4165587 -1.812 0.070136 .
ns(dos, df = 10 * trend_df)18 0.3153634 0.4294361 0.734 0.462775
ns(dos, df = 10 * trend_df)19 0.3169441 0.3761137 0.843 0.399465
ns(dos, df = 10 * trend_df)20 0.9033308 0.3660175 2.468 0.013635 *
ns(dos, df = 10 * trend_df)21 -0.1041196 0.3738877 -0.278 0.780662
ns(dos, df = 10 * trend_df)22 1.1412016 0.3575339 3.192 0.001426 **
ns(dos, df = 10 * trend_df)23 0.1288197 0.3916974 0.329 0.742270
ns(dos, df = 10 * trend_df)24 0.7538852 0.3893076 1.936 0.052891 .
ns(dos, df = 10 * trend_df)25 0.9750480 0.4100772 2.378 0.017474 *
ns(dos, df = 10 * trend_df)26 0.1975424 0.3802096 0.520 0.603402
ns(dos, df = 10 * trend_df)27 -0.4322074 0.3771566 -1.146 0.251890
ns(dos, df = 10 * trend_df)28 0.6356608 0.3621247 1.755 0.079286 .
ns(dos, df = 10 * trend_df)29 1.0673142 0.3595173 2.969 0.003011 **
ns(dos, df = 10 * trend_df)30 0.1287451 0.4219465 0.305 0.760292
ns(dos, df = 10 * trend_df)31 0.1093384 0.3945192 0.277 0.781687
ns(dos, df = 10 * trend_df)32 0.5879758 0.4081295 1.441 0.149771
ns(dos, df = 10 * trend_df)33 0.5000772 0.3804599 1.314 0.188798
ns(dos, df = 10 * trend_df)34 0.6856981 0.3469802 1.976 0.048213 *
ns(dos, df = 10 * trend_df)35 1.1784024 0.3723688 3.165 0.001566 **
ns(dos, df = 10 * trend_df)36 0.0960919 0.3497702 0.275 0.783541
ns(dos, df = 10 * trend_df)37 0.2188771 0.4076512 0.537 0.591356
ns(dos, df = 10 * trend_df)38 1.1243102 0.3909058 2.876 0.004050 **
ns(dos, df = 10 * trend_df)39 0.5472236 0.4055893 1.349 0.177359
ns(dos, df = 10 * trend_df)40 0.3836715 0.3869929 0.991 0.321551
ns(dos, df = 10 * trend_df)41 -0.0475495 0.3874454 -0.123 0.902332
ns(dos, df = 10 * trend_df)42 -0.5383873 0.3875989 -1.389 0.164913
ns(dos, df = 10 * trend_df)43 1.5538601 0.3523201 4.410 1.06e-05 ***
ns(dos, df = 10 * trend_df)44 0.4011037 0.4129479 0.971 0.331458
ns(dos, df = 10 * trend_df)45 0.1423757 0.4001527 0.356 0.722010
ns(dos, df = 10 * trend_df)46 0.1128887 0.4155741 0.272 0.785911
ns(dos, df = 10 * trend_df)47 0.4619514 0.3811831 1.212 0.225638
ns(dos, df = 10 * trend_df)48 0.1630531 0.3813022 0.428 0.668953
ns(dos, df = 10 * trend_df)49 -0.2127009 0.3906294 -0.545 0.586127
ns(dos, df = 10 * trend_df)50 0.6608814 0.3591247 1.840 0.065816 .
ns(dos, df = 10 * trend_df)51 0.2155257 0.4203650 0.513 0.608186
ns(dos, df = 10 * trend_df)52 0.1086832 0.4229558 0.257 0.797224
ns(dos, df = 10 * trend_df)53 0.6313049 0.3956350 1.596 0.110653
ns(dos, df = 10 * trend_df)54 0.3613383 0.4008369 0.901 0.367407
ns(dos, df = 10 * trend_df)55 0.5361872 0.3478824 1.541 0.123338
ns(dos, df = 10 * trend_df)56 0.9130877 0.3846419 2.374 0.017657 *
ns(dos, df = 10 * trend_df)57 0.6538293 0.3522626 1.856 0.063527 .
ns(dos, df = 10 * trend_df)58 0.8777681 0.4292818 2.045 0.040956 *
ns(dos, df = 10 * trend_df)59 0.2278709 0.4058652 0.561 0.574531
ns(dos, df = 10 * trend_df)60 0.1307263 0.4172703 0.313 0.754080
ns(dos, df = 10 * trend_df)61 0.6635502 0.3857125 1.720 0.085463 .
ns(dos, df = 10 * trend_df)62 0.6422523 0.3559697 1.804 0.071282 .
ns(dos, df = 10 * trend_df)63 0.4363803 0.3762755 1.160 0.246236
ns(dos, df = 10 * trend_df)64 1.1266372 0.3555550 3.169 0.001545 **
ns(dos, df = 10 * trend_df)65 0.0357018 0.4227793 0.084 0.932707
ns(dos, df = 10 * trend_df)66 0.5818062 0.4249520 1.369 0.171054
ns(dos, df = 10 * trend_df)67 1.0917789 0.4220827 2.587 0.009732 **
ns(dos, df = 10 * trend_df)68 0.5217567 0.3044827 1.714 0.086695 .
ns(dos, df = 10 * trend_df)69 0.5761929 0.7550888 0.763 0.445468
ns(dos, df = 10 * trend_df)70 -0.0060447 0.1776860 -0.034 0.972864

```

```

---
Signif. codes: 0 '***' 0.001 '**' 0.01 '*' 0.05 '.' 0.1 ' ' 1

```

Approximate significance of smooth terms:

```

      edf Ref.df      F p-value
s(sqrt(influ)) 1.259 1.482 9.878 0.000315 ***

```

```

---
Signif. codes: 0 '***' 0.001 '**' 0.01 '*' 0.05 '.' 0.1 ' ' 1

```

```

R-sq.(adj) = 0.474  Deviance explained = 47.9%
GCV = 1.0821  Scale est. = 0.98661  n = 3632

```

**2. Secondary model 1:**  $\log[E(Y_t)] = \alpha + \text{cb}(\text{Apparent Temperature}_t) + \text{cb}(\text{Relative Humidity}_t) + \text{cb}(\text{factor}(\text{Rainfall}_t)) + \text{cb}(\text{NO}_{2t}) + \text{cb}(\log(\text{SO}_{2t})) + \text{cb}(\text{O}_{3t}) + \text{cb}(\log(\text{PM}_{10t})) + \text{cb}(\text{factor}(\text{Holiday}_t)) + \text{ns}(\text{DOS}_t, \text{df} = 7 \text{ per year}) + \text{factor}(\text{DOW}_t) + s(\sqrt{\text{Influenza}_t}, k = 7)$

Family: quasipoisson

Link function: log

Formula:

ad ~ AT.cb + humid.cb + rainfall.cb + o3.cb + so2.cb + no2.cb + pm10.cb + holiday.cb + factor(dow) + ns(dos, df = 10 \* trend\_df) + s(sqrt(influ), k = 7)

Parametric coefficients:

|                  | Estimate   | Std. Error | t value | Pr(> t )    |
|------------------|------------|------------|---------|-------------|
| (Intercept)      | 1.6660412  | 0.7586414  | 2.196   | 0.028155 *  |
| AT.cbv1.l1       | 0.0552618  | 0.0477023  | 1.158   | 0.246754    |
| AT.cbv1.l2       | -0.1034158 | 0.0444522  | -2.326  | 0.020054 *  |
| AT.cbv1.l3       | 0.0631939  | 0.0685733  | 0.922   | 0.356829    |
| AT.cbv1.l4       | -0.0334739 | 0.0473336  | -0.707  | 0.479496    |
| AT.cbv2.l1       | 0.2376932  | 0.1459218  | 1.629   | 0.103427    |
| AT.cbv2.l2       | -0.2115769 | 0.1356748  | -1.559  | 0.118987    |
| AT.cbv2.l3       | 0.1915229  | 0.2004322  | 0.956   | 0.339369    |
| AT.cbv2.l4       | -0.1378967 | 0.1445228  | -0.954  | 0.340076    |
| AT.cbv3.l1       | 0.0423648  | 0.0472982  | 0.896   | 0.370479    |
| AT.cbv3.l2       | -0.0966215 | 0.0457569  | -2.112  | 0.034793 *  |
| AT.cbv3.l3       | 0.1121366  | 0.0661026  | 1.696   | 0.089903    |
| AT.cbv3.l4       | -0.0018263 | 0.0468047  | -0.039  | 0.968877    |
| humid.cbv1.l1    | -0.0218804 | 0.0356452  | -0.614  | 0.539365    |
| humid.cbv1.l2    | 0.0224829  | 0.0347639  | 0.647   | 0.517850    |
| humid.cbv1.l3    | -0.0009628 | 0.0477471  | -0.020  | 0.983914    |
| humid.cbv1.l4    | -0.0370310 | 0.0348635  | -1.062  | 0.288234    |
| humid.cbv2.l1    | -0.0646684 | 0.1164570  | -0.555  | 0.578728    |
| humid.cbv2.l2    | 0.1329434  | 0.1113794  | 1.194   | 0.232716    |
| humid.cbv2.l3    | -0.0641735 | 0.1653667  | -0.388  | 0.697990    |
| humid.cbv2.l4    | -0.0963373 | 0.1162263  | -0.829  | 0.407234    |
| humid.cbv3.l1    | -0.0068002 | 0.0432011  | -0.157  | 0.874933    |
| humid.cbv3.l2    | 0.0665029  | 0.0423867  | 1.569   | 0.116753    |
| humid.cbv3.l3    | -0.0534840 | 0.0575815  | -0.929  | 0.353040    |
| humid.cbv3.l4    | 0.0285791  | 0.0404871  | 0.706   | 0.480312    |
| rainfall.cbv1.l1 | -0.0031316 | 0.0115235  | -0.272  | 0.785827    |
| rainfall.cbv1.l2 | -0.0049700 | 0.0121226  | -0.410  | 0.681846    |
| rainfall.cbv1.l3 | 0.0040544  | 0.0150196  | 0.270   | 0.787220    |
| rainfall.cbv1.l4 | 0.0053266  | 0.0109031  | 0.489   | 0.625197    |
| rainfall.cbv2.l1 | -0.0105060 | 0.0292174  | -0.360  | 0.719184    |
| rainfall.cbv2.l2 | -0.0421359 | 0.0321307  | -1.311  | 0.189816    |
| rainfall.cbv2.l3 | 0.0412199  | 0.0378669  | 1.089   | 0.276433    |
| rainfall.cbv2.l4 | -0.0502319 | 0.0282973  | -1.775  | 0.075965    |
| o3.cbv1.l1       | 0.0348665  | 0.0295563  | 1.180   | 0.238217    |
| o3.cbv1.l2       | -0.0416967 | 0.0294356  | -1.417  | 0.156711    |
| o3.cbv1.l3       | -0.0463252 | 0.0409948  | -1.130  | 0.258546    |
| o3.cbv1.l4       | 0.0248903  | 0.0290758  | 0.856   | 0.392031    |
| o3.cbv2.l1       | 0.0227358  | 0.0387075  | 0.587   | 0.556992    |
| o3.cbv2.l2       | 0.0025551  | 0.0397889  | 0.064   | 0.948801    |
| o3.cbv2.l3       | -0.0224234 | 0.0527896  | -0.425  | 0.671032    |
| o3.cbv2.l4       | -0.0292102 | 0.0378654  | -0.771  | 0.440512    |
| o3.cbv3.l1       | 0.0649870  | 0.0744233  | 0.873   | 0.382613    |
| o3.cbv3.l2       | -0.0755945 | 0.0759536  | -0.995  | 0.319676    |
| o3.cbv3.l3       | -0.1363626 | 0.1003953  | -1.358  | 0.174474    |
| o3.cbv3.l4       | 0.0494855  | 0.0731764  | 0.676   | 0.498929    |
| o3.cbv4.l1       | 0.1564937  | 0.0718709  | 2.177   | 0.029519 *  |
| o3.cbv4.l2       | -0.1974352 | 0.0761727  | -2.592  | 0.009585 ** |
| o3.cbv4.l3       | -0.0179600 | 0.0957428  | -0.188  | 0.851213    |
| o3.cbv4.l4       | 0.1257924  | 0.0725845  | 1.733   | 0.083180    |
| so2.cbv1.l1      | 0.0167104  | 0.0541531  | 0.309   | 0.757662    |
| so2.cbv1.l2      | 0.0831071  | 0.0531672  | 1.563   | 0.118118    |
| so2.cbv1.l3      | 0.0001811  | 0.0739389  | 0.002   | 0.998046    |
| so2.cbv1.l4      | -0.0649959 | 0.0516835  | -1.258  | 0.208634    |
| so2.cbv2.l1      | 0.0512144  | 0.0489616  | 1.046   | 0.295632    |
| so2.cbv2.l2      | 0.0676012  | 0.0492383  | 1.373   | 0.169864    |
| so2.cbv2.l3      | -0.0380584 | 0.0660353  | -0.576  | 0.564428    |
| so2.cbv2.l4      | -0.0034456 | 0.0473060  | -0.073  | 0.941941    |

|                               |            |           |        |              |
|-------------------------------|------------|-----------|--------|--------------|
| so2.cbv3.11                   | 0.0512808  | 0.1243337 | 0.412  | 0.680040     |
| so2.cbv3.12                   | 0.1955869  | 0.1250029 | 1.565  | 0.117758     |
| so2.cbv3.13                   | -0.1419627 | 0.1713154 | -0.829 | 0.407355     |
| so2.cbv3.14                   | -0.1093854 | 0.1195790 | -0.915 | 0.360387     |
| so2.cbv4.11                   | -0.0021016 | 0.0774203 | -0.027 | 0.978345     |
| so2.cbv4.12                   | 0.0148940  | 0.0813678 | 0.183  | 0.854773     |
| so2.cbv4.13                   | -0.1435432 | 0.1088079 | -1.319 | 0.187182     |
| so2.cbv4.14                   | -0.0180096 | 0.0761196 | -0.237 | 0.812985     |
| no2.cbv1.11                   | -0.0651355 | 0.0527155 | -1.236 | 0.216693     |
| no2.cbv1.12                   | 0.0240398  | 0.0527676 | 0.456  | 0.648722     |
| no2.cbv1.13                   | -0.0233851 | 0.0722192 | -0.324 | 0.746104     |
| no2.cbv1.14                   | 0.0724792  | 0.0537295 | 1.349  | 0.177440     |
| no2.cbv2.11                   | 0.0133337  | 0.0507296 | 0.263  | 0.792692     |
| no2.cbv2.12                   | 0.0124311  | 0.0529264 | 0.235  | 0.814321     |
| no2.cbv2.13                   | 0.0291712  | 0.0688185 | 0.424  | 0.671676     |
| no2.cbv2.14                   | 0.0585159  | 0.0513353 | 1.140  | 0.254420     |
| no2.cbv3.11                   | -0.1983282 | 0.1208347 | -1.641 | 0.100826     |
| no2.cbv3.12                   | 0.2152031  | 0.1223656 | 1.759  | 0.078722     |
| no2.cbv3.13                   | -0.0379806 | 0.1657823 | -0.229 | 0.818806     |
| no2.cbv3.14                   | 0.2064575  | 0.1214117 | 1.700  | 0.089135     |
| no2.cbv4.11                   | -0.0736111 | 0.1029959 | -0.715 | 0.474845     |
| no2.cbv4.12                   | 0.1499224  | 0.1062928 | 1.410  | 0.158496     |
| no2.cbv4.13                   | 0.0300032  | 0.1462432 | 0.205  | 0.837460     |
| no2.cbv4.14                   | 0.1414452  | 0.1034423 | 1.367  | 0.171598     |
| pm10.cbv1.11                  | -0.0413979 | 0.0564995 | -0.733 | 0.463785     |
| pm10.cbv1.12                  | -0.0148565 | 0.0534441 | -0.278 | 0.781043     |
| pm10.cbv1.13                  | 0.1699841  | 0.0763136 | 2.227  | 0.025984 *   |
| pm10.cbv1.14                  | -0.1356220 | 0.0539619 | -2.513 | 0.012008 *   |
| pm10.cbv2.11                  | -0.0655134 | 0.0532196 | -1.231 | 0.218409     |
| pm10.cbv2.12                  | -0.0535008 | 0.0528486 | -1.012 | 0.311449     |
| pm10.cbv2.13                  | 0.0908371  | 0.0754894 | 1.203  | 0.228942     |
| pm10.cbv2.14                  | -0.1419105 | 0.0531216 | -2.671 | 0.007590 **  |
| pm10.cbv3.11                  | 0.0621278  | 0.1325245 | 0.469  | 0.639242     |
| pm10.cbv3.12                  | -0.1970264 | 0.1281867 | -1.537 | 0.124382     |
| pm10.cbv3.13                  | 0.3798868  | 0.1784794 | 2.128  | 0.033372 *   |
| pm10.cbv3.14                  | -0.2472232 | 0.1270476 | -1.946 | 0.051750 .   |
| pm10.cbv4.11                  | 0.0051321  | 0.1264202 | 0.041  | 0.967621     |
| pm10.cbv4.12                  | -0.0879770 | 0.1327344 | -0.663 | 0.507501     |
| pm10.cbv4.13                  | 0.2528895  | 0.1743678 | 1.450  | 0.147063     |
| pm10.cbv4.14                  | -0.0317103 | 0.1314118 | -0.241 | 0.809334     |
| holiday.cbv1.11               | 0.0229240  | 0.0140656 | 1.630  | 0.103241     |
| holiday.cbv1.12               | -0.0384166 | 0.0127883 | -3.004 | 0.002684 **  |
| holiday.cbv1.13               | -0.0271741 | 0.0184173 | -1.475 | 0.140180     |
| holiday.cbv1.14               | -0.0262329 | 0.0133766 | -1.961 | 0.049950 *   |
| factor(dow)2                  | -0.0649037 | 0.0225217 | -2.882 | 0.003979 **  |
| factor(dow)3                  | -0.0786969 | 0.0238626 | -3.298 | 0.000984 *** |
| factor(dow)4                  | -0.0522564 | 0.0241511 | -2.164 | 0.030556 *   |
| factor(dow)5                  | -0.0788882 | 0.0240608 | -3.279 | 0.001054 **  |
| factor(dow)6                  | -0.0962840 | 0.0238861 | -4.031 | 5.68e-05 *** |
| factor(dow)7                  | -0.0411008 | 0.0231921 | -1.772 | 0.076455 .   |
| ns(dos, df = 10 * trend_df)1  | 0.9348702  | 0.3096874 | 3.019  | 0.002557 **  |
| ns(dos, df = 10 * trend_df)2  | -0.0803316 | 0.4164357 | -0.193 | 0.847047     |
| ns(dos, df = 10 * trend_df)3  | 1.0230267  | 0.3934626 | 2.600  | 0.009362 **  |
| ns(dos, df = 10 * trend_df)4  | 0.2611783  | 0.4190711 | 0.623  | 0.533175     |
| ns(dos, df = 10 * trend_df)5  | 0.4308111  | 0.3930425 | 1.096  | 0.273117     |
| ns(dos, df = 10 * trend_df)6  | -0.3433589 | 0.4087290 | -0.840 | 0.400932     |
| ns(dos, df = 10 * trend_df)7  | -0.0118598 | 0.3584741 | -0.033 | 0.973610     |
| ns(dos, df = 10 * trend_df)8  | 1.1995473  | 0.3593351 | 3.338  | 0.000852 *** |
| ns(dos, df = 10 * trend_df)9  | -0.9221487 | 0.4106954 | -2.245 | 0.024812 *   |
| ns(dos, df = 10 * trend_df)10 | -0.1866354 | 0.4136076 | -0.451 | 0.651848     |
| ns(dos, df = 10 * trend_df)11 | -0.2841876 | 0.4413071 | -0.644 | 0.519641     |
| ns(dos, df = 10 * trend_df)12 | 0.6536305  | 0.3931383 | 1.663  | 0.096487 .   |
| ns(dos, df = 10 * trend_df)13 | -0.5691370 | 0.3824402 | -1.488 | 0.136800     |
| ns(dos, df = 10 * trend_df)14 | 1.3880733  | 0.3552156 | 3.908  | 9.50e-05 *** |
| ns(dos, df = 10 * trend_df)15 | 0.7389734  | 0.3566781 | 2.072  | 0.038359 *   |
| ns(dos, df = 10 * trend_df)16 | 0.0195143  | 0.3967728 | 0.049  | 0.960777     |
| ns(dos, df = 10 * trend_df)17 | -0.7927040 | 0.4170666 | -1.901 | 0.057432 .   |
| ns(dos, df = 10 * trend_df)18 | 0.2183160  | 0.4275896 | 0.511  | 0.609683     |
| ns(dos, df = 10 * trend_df)19 | 0.3343548  | 0.3729369 | 0.897  | 0.370026     |
| ns(dos, df = 10 * trend_df)20 | 0.9254000  | 0.3714831 | 2.491  | 0.012783 *   |
| ns(dos, df = 10 * trend_df)21 | -0.1336946 | 0.3742418 | -0.357 | 0.720934     |

```

ns(dos, df = 10 * trend_df)22 1.1972173 0.3591861 3.333 0.000868 ***
ns(dos, df = 10 * trend_df)23 0.0118967 0.3885849 0.031 0.975578
ns(dos, df = 10 * trend_df)24 0.7251224 0.3867721 1.875 0.060907 .
ns(dos, df = 10 * trend_df)25 0.8458428 0.4134686 2.046 0.040862 *
ns(dos, df = 10 * trend_df)26 0.2569205 0.3719087 0.691 0.489729
ns(dos, df = 10 * trend_df)27 -0.4461225 0.3833977 -1.164 0.244669
ns(dos, df = 10 * trend_df)28 0.6629031 0.3611692 1.835 0.066530 .
ns(dos, df = 10 * trend_df)29 1.0391171 0.3682964 2.821 0.004810 **
ns(dos, df = 10 * trend_df)30 0.1485589 0.4257700 0.349 0.727173
ns(dos, df = 10 * trend_df)31 0.0513062 0.3928524 0.131 0.896100
ns(dos, df = 10 * trend_df)32 0.4906748 0.4061067 1.208 0.227040
ns(dos, df = 10 * trend_df)33 0.5155347 0.3745580 1.376 0.168796
ns(dos, df = 10 * trend_df)34 0.7009934 0.3520285 1.991 0.046530 *
ns(dos, df = 10 * trend_df)35 1.1763850 0.3748126 3.139 0.001712 **
ns(dos, df = 10 * trend_df)36 0.1230499 0.3514770 0.350 0.726291
ns(dos, df = 10 * trend_df)37 0.1355332 0.4026633 0.337 0.736446
ns(dos, df = 10 * trend_df)38 1.1019279 0.3907503 2.820 0.004830 **
ns(dos, df = 10 * trend_df)39 0.4670187 0.4022368 1.161 0.245703
ns(dos, df = 10 * trend_df)40 0.3887944 0.3783013 1.028 0.304148
ns(dos, df = 10 * trend_df)41 -0.0256821 0.3917498 -0.066 0.947734
ns(dos, df = 10 * trend_df)42 -0.5588517 0.3885952 -1.438 0.150490
ns(dos, df = 10 * trend_df)43 1.5858538 0.3556713 4.459 8.52e-06 ***
ns(dos, df = 10 * trend_df)44 0.3081121 0.4151729 0.742 0.458061
ns(dos, df = 10 * trend_df)45 0.0408652 0.4048381 0.101 0.919603
ns(dos, df = 10 * trend_df)46 -0.0130057 0.4174507 -0.031 0.975148
ns(dos, df = 10 * trend_df)47 0.4410692 0.3781409 1.166 0.243530
ns(dos, df = 10 * trend_df)48 0.1638694 0.3867899 0.424 0.671837
ns(dos, df = 10 * trend_df)49 -0.2254507 0.3913279 -0.576 0.564575
ns(dos, df = 10 * trend_df)50 0.6883038 0.3620310 1.901 0.057358 .
ns(dos, df = 10 * trend_df)51 0.1323519 0.4167186 0.318 0.750804
ns(dos, df = 10 * trend_df)52 -0.0167819 0.4269387 -0.039 0.968648
ns(dos, df = 10 * trend_df)53 0.5195820 0.3981041 1.305 0.191935
ns(dos, df = 10 * trend_df)54 0.3275957 0.3929122 0.834 0.404474
ns(dos, df = 10 * trend_df)55 0.5389357 0.3528137 1.528 0.126723
ns(dos, df = 10 * trend_df)56 0.8693710 0.3848434 2.259 0.023946 *
ns(dos, df = 10 * trend_df)57 0.7022714 0.3553213 1.976 0.048187 *
ns(dos, df = 10 * trend_df)58 0.7339430 0.4301806 1.706 0.088078 .
ns(dos, df = 10 * trend_df)59 0.1534584 0.4069458 0.377 0.706125
ns(dos, df = 10 * trend_df)60 0.0042170 0.4202259 0.010 0.991994
ns(dos, df = 10 * trend_df)61 0.6576398 0.3811990 1.725 0.084586 .
ns(dos, df = 10 * trend_df)62 0.6332635 0.3593769 1.762 0.078142 .
ns(dos, df = 10 * trend_df)63 0.3733542 0.3790214 0.985 0.324672
ns(dos, df = 10 * trend_df)64 1.1305471 0.3587700 3.151 0.001641 **
ns(dos, df = 10 * trend_df)65 -0.0773355 0.4220216 -0.183 0.854613
ns(dos, df = 10 * trend_df)66 0.5305942 0.4265496 1.244 0.213616
ns(dos, df = 10 * trend_df)67 0.8842477 0.4293260 2.060 0.039513 *
ns(dos, df = 10 * trend_df)68 0.5238019 0.2922416 1.792 0.073166 .
ns(dos, df = 10 * trend_df)69 0.5981283 0.7591184 0.788 0.430797
ns(dos, df = 10 * trend_df)70 -0.0693098 0.1784268 -0.388 0.697708

```

Signif. codes: 0 '\*\*\*' 0.001 '\*\*' 0.01 '\*' 0.05 '.' 0.1 ' ' 1

Approximate significance of smooth terms:

```

      edf Ref.df      F p-value
s(sqrt(influ)) 1.47  1.833 6.815 0.00122 **

```

Signif. codes: 0 '\*\*\*' 0.001 '\*\*' 0.01 '\*' 0.05 '.' 0.1 ' ' 1

R-sq.(adj) = 0.48 Deviance explained = 48.6%  
GCV = 1.0847 Scale est. = 0.98601 n = 3507

**3. Secondary model 2:**  $\log[E(Y_t)] = \alpha + \text{cb}(\text{Vapour Pressure}_t) + \text{cb}(\text{factor}(\text{Rainfall}_t)) + \text{cb}(\text{NO}_{2t}) + \text{cb}(\log(\text{SO}_{2t})) + \text{cb}(\text{O}_{3t}) + \text{cb}(\log(\text{PM}_{10t})) + \text{cb}(\text{factor}(\text{Holiday}_t)) + \text{ns}(\text{DOS}_t, \text{df} = 7 \text{ per year}) + \text{factor}(\text{DOW}_t) + s(\sqrt{\text{Influenza}_t}, k = 7)$

Family: quasipoisson

Link function: log

Formula:

ad ~ VP.cb + rainfall.cb + o3.cb + so2.cb + no2.cb + pm10.cb + holiday.cb + factor(dow) + ns(dos, df = 10 \* trend\_df) + s(sqrt(influ), k = 7)

Parametric coefficients:

|                  | Estimate   | Std. Error | t value | Pr(> t )   |
|------------------|------------|------------|---------|------------|
| (Intercept)      | 1.3553095  | 0.5661917  | 2.394   | 0.016731 * |
| VP.cbv1.l1       | -0.0051677 | 0.0275582  | -0.188  | 0.851264   |
| VP.cbv1.l2       | -0.0370730 | 0.0268103  | -1.383  | 0.166819   |
| VP.cbv1.l3       | 0.0166116  | 0.0390717  | 0.425   | 0.670749   |
| VP.cbv1.l4       | -0.0001894 | 0.0271655  | -0.007  | 0.994437   |
| VP.cbv2.l1       | 0.0736201  | 0.0682986  | 1.078   | 0.281147   |
| VP.cbv2.l2       | -0.1653748 | 0.0687627  | -2.405  | 0.016224 * |
| VP.cbv2.l3       | 0.0694318  | 0.0948159  | 0.732   | 0.464047   |
| VP.cbv2.l4       | -0.0303909 | 0.0677348  | -0.449  | 0.653694   |
| VP.cbv3.l1       | 0.0501825  | 0.0367864  | 1.364   | 0.172606   |
| VP.cbv3.l2       | -0.0702289 | 0.0341507  | -2.056  | 0.039815 * |
| VP.cbv3.l3       | -0.0011149 | 0.0510029  | -0.022  | 0.982561   |
| VP.cbv3.l4       | 0.0573688  | 0.0354223  | 1.620   | 0.105417   |
| rainfall.cbv1.l1 | -0.0089060 | 0.0095426  | -0.933  | 0.350734   |
| rainfall.cbv1.l2 | 0.0117857  | 0.0097057  | 1.214   | 0.224713   |
| rainfall.cbv1.l3 | 0.0042138  | 0.0131819  | 0.320   | 0.749243   |
| rainfall.cbv1.l4 | 0.0049149  | 0.0094476  | 0.520   | 0.602940   |
| rainfall.cbv2.l1 | -0.0185781 | 0.0234733  | -0.791  | 0.428733   |
| rainfall.cbv2.l2 | -0.0031497 | 0.0254193  | -0.124  | 0.901395   |
| rainfall.cbv2.l3 | 0.0097602  | 0.0311368  | 0.313   | 0.753949   |
| rainfall.cbv2.l4 | -0.0329604 | 0.0236611  | -1.393  | 0.163703   |
| o3.cbv1.l1       | 0.0350348  | 0.0279724  | 1.252   | 0.210480   |
| o3.cbv1.l2       | -0.0471171 | 0.0278681  | -1.691  | 0.090980   |
| o3.cbv1.l3       | -0.0414443 | 0.0393413  | -1.053  | 0.292206   |
| o3.cbv1.l4       | 0.0141358  | 0.0277313  | 0.510   | 0.610266   |
| o3.cbv2.l1       | 0.0324395  | 0.0363703  | 0.892   | 0.372497   |
| o3.cbv2.l2       | -0.0195819 | 0.0370433  | -0.529  | 0.597102   |
| o3.cbv2.l3       | -0.0096331 | 0.0501870  | -0.192  | 0.847797   |
| o3.cbv2.l4       | -0.0289869 | 0.0358466  | -0.809  | 0.418780   |
| o3.cbv3.l1       | 0.0665267  | 0.0717748  | 0.927   | 0.354053   |
| o3.cbv3.l2       | -0.0888793 | 0.0732998  | -1.213  | 0.225386   |
| o3.cbv3.l3       | -0.1384151 | 0.0969419  | -1.428  | 0.153435   |
| o3.cbv3.l4       | 0.0581507  | 0.0704800  | 0.825   | 0.409390   |
| o3.cbv4.l1       | 0.1555801  | 0.0703260  | 2.212   | 0.027013 * |
| o3.cbv4.l2       | -0.1850006 | 0.0742172  | -2.493  | 0.012724 * |
| o3.cbv4.l3       | -0.0411989 | 0.0938417  | -0.439  | 0.660670   |
| o3.cbv4.l4       | 0.1450825  | 0.0711142  | 2.040   | 0.041413 * |
| so2.cbv1.l1      | 0.0192957  | 0.0464112  | 0.416   | 0.677615   |
| so2.cbv1.l2      | 0.0453044  | 0.0455387  | 0.995   | 0.319876   |
| so2.cbv1.l3      | 0.0652402  | 0.0636952  | 1.024   | 0.305786   |
| so2.cbv1.l4      | -0.0983907 | 0.0451572  | -2.179  | 0.029410 * |
| so2.cbv2.l1      | 0.0575265  | 0.0423461  | 1.358   | 0.174398   |
| so2.cbv2.l2      | 0.0219654  | 0.0425749  | 0.516   | 0.605940   |
| so2.cbv2.l3      | 0.0162539  | 0.0574158  | 0.283   | 0.777124   |
| so2.cbv2.l4      | -0.0230780 | 0.0414628  | -0.557  | 0.577840   |
| so2.cbv3.l1      | 0.0597653  | 0.1104291  | 0.541   | 0.588398   |
| so2.cbv3.l2      | 0.1164419  | 0.1119523  | 1.040   | 0.298365   |
| so2.cbv3.l3      | -0.0011307 | 0.1518771  | -0.007  | 0.994060   |
| so2.cbv3.l4      | -0.1620714 | 0.1076844  | -1.505  | 0.132400   |
| so2.cbv4.l1      | -0.0106711 | 0.0716659  | -0.149  | 0.881640   |
| so2.cbv4.l2      | -0.0269358 | 0.0756726  | -0.356  | 0.721898   |
| so2.cbv4.l3      | -0.0254380 | 0.1003181  | -0.254  | 0.799840   |
| so2.cbv4.l4      | -0.0690957 | 0.0707578  | -0.977  | 0.328881   |
| no2.cbv1.l1      | -0.0544867 | 0.0501652  | -1.086  | 0.277490   |
| no2.cbv1.l2      | 0.0321086  | 0.0505383  | 0.635   | 0.525255   |
| no2.cbv1.l3      | -0.0337680 | 0.0679432  | -0.497  | 0.619218   |
| no2.cbv1.l4      | 0.1157413  | 0.0508129  | 2.278   | 0.022799 * |
| no2.cbv2.l1      | 0.0281539  | 0.0492771  | 0.571   | 0.567807   |

|                               |            |           |        |              |
|-------------------------------|------------|-----------|--------|--------------|
| no2.cbv2.12                   | 0.0265271  | 0.0510940 | 0.519  | 0.603667     |
| no2.cbv2.13                   | 0.0314189  | 0.0663276 | 0.474  | 0.635749     |
| no2.cbv2.14                   | 0.1039874  | 0.0496052 | 2.096  | 0.036128 *   |
| no2.cbv3.11                   | -0.1666180 | 0.1183115 | -1.408 | 0.159132     |
| no2.cbv3.12                   | 0.2087022  | 0.1203854 | 1.734  | 0.083075 .   |
| no2.cbv3.13                   | -0.0291471 | 0.1604221 | -0.182 | 0.855837     |
| no2.cbv3.14                   | 0.2799515  | 0.1178405 | 2.376  | 0.017571 *   |
| no2.cbv4.11                   | -0.0545403 | 0.1007962 | -0.541 | 0.588477     |
| no2.cbv4.12                   | 0.1379325  | 0.1043397 | 1.322  | 0.186270     |
| no2.cbv4.13                   | -0.0173810 | 0.1432889 | -0.121 | 0.903460     |
| no2.cbv4.14                   | 0.1642793  | 0.1012649 | 1.622  | 0.104836     |
| pm10.cbv1.11                  | -0.0407622 | 0.0533743 | -0.764 | 0.445095     |
| pm10.cbv1.12                  | -0.0517256 | 0.0510717 | -1.013 | 0.311224     |
| pm10.cbv1.13                  | 0.2054219  | 0.0720623 | 2.851  | 0.004389 **  |
| pm10.cbv1.14                  | -0.1512313 | 0.0515482 | -2.934 | 0.003371 **  |
| pm10.cbv2.11                  | -0.0694038 | 0.0512745 | -1.354 | 0.175961     |
| pm10.cbv2.12                  | -0.0543270 | 0.0506952 | -1.072 | 0.283956     |
| pm10.cbv2.13                  | 0.0810566  | 0.0727806 | 1.114  | 0.265480     |
| pm10.cbv2.14                  | -0.1532471 | 0.0514432 | -2.979 | 0.002912 **  |
| pm10.cbv3.11                  | 0.0800839  | 0.1273213 | 0.629  | 0.529397     |
| pm10.cbv3.12                  | -0.2573946 | 0.1233464 | -2.087 | 0.036983 *   |
| pm10.cbv3.13                  | 0.4379224  | 0.1715185 | 2.553  | 0.010716 *   |
| pm10.cbv3.14                  | -0.2506877 | 0.1233479 | -2.032 | 0.042193 *   |
| pm10.cbv4.11                  | 0.0507315  | 0.1222589 | 0.415  | 0.678203     |
| pm10.cbv4.12                  | -0.1276988 | 0.1284987 | -0.994 | 0.320402     |
| pm10.cbv4.13                  | 0.2442471  | 0.1718410 | 1.421  | 0.155304     |
| pm10.cbv4.14                  | -0.0219763 | 0.1290729 | -0.170 | 0.864814     |
| holiday.cbv1.11               | 0.0216149  | 0.0139777 | 1.546  | 0.122103     |
| holiday.cbv1.12               | -0.0389137 | 0.0126002 | -3.088 | 0.002029 **  |
| holiday.cbv1.13               | -0.0243269 | 0.0182945 | -1.330 | 0.183692     |
| holiday.cbv1.14               | -0.0253565 | 0.0132018 | -1.921 | 0.054853 .   |
| factor(dow)2                  | -0.0593118 | 0.0221940 | -2.672 | 0.007566 **  |
| factor(dow)3                  | -0.0739103 | 0.0235176 | -3.143 | 0.001688 **  |
| factor(dow)4                  | -0.0438628 | 0.0237731 | -1.845 | 0.065114 .   |
| factor(dow)5                  | -0.0746431 | 0.0237100 | -3.148 | 0.001657 **  |
| factor(dow)6                  | -0.0892264 | 0.0235227 | -3.793 | 0.000151 *** |
| factor(dow)7                  | -0.0417234 | 0.0228870 | -1.823 | 0.068387 .   |
| ns(dos, df = 10 * trend_df)1  | 1.0053188  | 0.3018644 | 3.330  | 0.000876 *** |
| ns(dos, df = 10 * trend_df)2  | -0.0733716 | 0.4172199 | -0.176 | 0.860415     |
| ns(dos, df = 10 * trend_df)3  | 1.0199234  | 0.3882061 | 2.627  | 0.008645 **  |
| ns(dos, df = 10 * trend_df)4  | 0.3463243  | 0.4060638 | 0.853  | 0.393784     |
| ns(dos, df = 10 * trend_df)5  | 0.4701391  | 0.3666328 | 1.282  | 0.199818     |
| ns(dos, df = 10 * trend_df)6  | -0.2401648 | 0.3955762 | -0.607 | 0.543807     |
| ns(dos, df = 10 * trend_df)7  | -0.0260474 | 0.3533197 | -0.074 | 0.941236     |
| ns(dos, df = 10 * trend_df)8  | 1.2971209  | 0.3541993 | 3.662  | 0.000254 *** |
| ns(dos, df = 10 * trend_df)9  | -0.8712522 | 0.3967492 | -2.196 | 0.028160 *   |
| ns(dos, df = 10 * trend_df)10 | -0.1775152 | 0.4185246 | -0.424 | 0.671486     |
| ns(dos, df = 10 * trend_df)11 | -0.1639397 | 0.4219056 | -0.389 | 0.697618     |
| ns(dos, df = 10 * trend_df)12 | 0.6751854  | 0.3725418 | 1.812  | 0.070015 .   |
| ns(dos, df = 10 * trend_df)13 | -0.5013254 | 0.3614264 | -1.387 | 0.165508     |
| ns(dos, df = 10 * trend_df)14 | 1.3977460  | 0.3488010 | 4.007  | 6.27e-05 *** |
| ns(dos, df = 10 * trend_df)15 | 0.8347699  | 0.3524784 | 2.368  | 0.017925 *   |
| ns(dos, df = 10 * trend_df)16 | 0.0515214  | 0.3942280 | 0.131  | 0.896029     |
| ns(dos, df = 10 * trend_df)17 | -0.7347354 | 0.4198475 | -1.750 | 0.080206 .   |
| ns(dos, df = 10 * trend_df)18 | 0.2638040  | 0.4153546 | 0.635  | 0.525386     |
| ns(dos, df = 10 * trend_df)19 | 0.4053899  | 0.3674312 | 1.103  | 0.269970     |
| ns(dos, df = 10 * trend_df)20 | 0.9291309  | 0.3633743 | 2.557  | 0.010602 *   |
| ns(dos, df = 10 * trend_df)21 | -0.1141378 | 0.3633280 | -0.314 | 0.753430     |
| ns(dos, df = 10 * trend_df)22 | 1.2252529  | 0.3535204 | 3.466  | 0.000535 *** |
| ns(dos, df = 10 * trend_df)23 | 0.0883765  | 0.3766806 | 0.235  | 0.814518     |
| ns(dos, df = 10 * trend_df)24 | 0.7963751  | 0.3922070 | 2.030  | 0.042382 *   |
| ns(dos, df = 10 * trend_df)25 | 0.9461921  | 0.3956940 | 2.391  | 0.016845 *   |
| ns(dos, df = 10 * trend_df)26 | 0.2515012  | 0.3644274 | 0.690  | 0.490161     |
| ns(dos, df = 10 * trend_df)27 | -0.3910095 | 0.3693294 | -1.059 | 0.289810     |
| ns(dos, df = 10 * trend_df)28 | 0.6571490  | 0.3495717 | 1.880  | 0.060210 .   |
| ns(dos, df = 10 * trend_df)29 | 1.2016442  | 0.3569473 | 3.366  | 0.000770 *** |
| ns(dos, df = 10 * trend_df)30 | 0.0220232  | 0.4114475 | 0.054  | 0.957316     |
| ns(dos, df = 10 * trend_df)31 | 0.1566382  | 0.3897626 | 0.402  | 0.687796     |
| ns(dos, df = 10 * trend_df)32 | 0.5486411  | 0.3934679 | 1.394  | 0.163294     |
| ns(dos, df = 10 * trend_df)33 | 0.5550475  | 0.3643537 | 1.523  | 0.127756     |
| ns(dos, df = 10 * trend_df)34 | 0.7738539  | 0.3409383 | 2.270  | 0.023282 *   |

```

ns(dos, df = 10 * trend_df)35 1.1660641 0.3613343 3.227 0.001262 **
ns(dos, df = 10 * trend_df)36 0.2220552 0.3445922 0.644 0.519359
ns(dos, df = 10 * trend_df)37 0.1518120 0.4031203 0.377 0.706500
ns(dos, df = 10 * trend_df)38 1.1555986 0.3847944 3.003 0.002691 **
ns(dos, df = 10 * trend_df)39 0.4897097 0.4063586 1.205 0.228240
ns(dos, df = 10 * trend_df)40 0.4762154 0.3646694 1.306 0.191679
ns(dos, df = 10 * trend_df)41 -0.0188192 0.3872195 -0.049 0.961240
ns(dos, df = 10 * trend_df)42 -0.5647915 0.3723370 -1.517 0.129387
ns(dos, df = 10 * trend_df)43 1.7093045 0.3491602 4.895 1.03e-06 ***
ns(dos, df = 10 * trend_df)44 0.3305572 0.3981937 0.830 0.406516
ns(dos, df = 10 * trend_df)45 0.1669668 0.4079098 0.409 0.682328
ns(dos, df = 10 * trend_df)46 0.0622764 0.4056984 0.154 0.878010
ns(dos, df = 10 * trend_df)47 0.5551462 0.3660050 1.517 0.129415
ns(dos, df = 10 * trend_df)48 0.1556012 0.3755963 0.414 0.678696
ns(dos, df = 10 * trend_df)49 -0.1621871 0.3828264 -0.424 0.671842
ns(dos, df = 10 * trend_df)50 0.7622711 0.3517725 2.167 0.030307 *
ns(dos, df = 10 * trend_df)51 0.1223278 0.4180436 0.293 0.769830
ns(dos, df = 10 * trend_df)52 0.1600776 0.4078557 0.392 0.694723
ns(dos, df = 10 * trend_df)53 0.5942923 0.3955386 1.502 0.133062
ns(dos, df = 10 * trend_df)54 0.3892705 0.3768845 1.033 0.301740
ns(dos, df = 10 * trend_df)55 0.6049207 0.3440421 1.758 0.078789 .
ns(dos, df = 10 * trend_df)56 0.8654396 0.3735774 2.317 0.020582 *
ns(dos, df = 10 * trend_df)57 0.8190290 0.3483579 2.351 0.018773 *
ns(dos, df = 10 * trend_df)58 0.7551938 0.4116690 1.834 0.066670 .
ns(dos, df = 10 * trend_df)59 0.2679309 0.4124670 0.650 0.516006
ns(dos, df = 10 * trend_df)60 0.0836855 0.4071016 0.206 0.837143
ns(dos, df = 10 * trend_df)61 0.6969491 0.3738524 1.864 0.062373 .
ns(dos, df = 10 * trend_df)62 0.7025813 0.3536095 1.987 0.047014 *
ns(dos, df = 10 * trend_df)63 0.4321847 0.3711280 1.165 0.244295
ns(dos, df = 10 * trend_df)64 1.2265577 0.3530616 3.474 0.000519 ***
ns(dos, df = 10 * trend_df)65 -0.0542336 0.4122271 -0.132 0.895338
ns(dos, df = 10 * trend_df)66 0.6087704 0.4147462 1.468 0.142245
ns(dos, df = 10 * trend_df)67 1.0404031 0.4240504 2.453 0.014197 *
ns(dos, df = 10 * trend_df)68 0.6124457 0.2615844 2.341 0.019273 *
ns(dos, df = 10 * trend_df)69 0.5883909 0.7494997 0.785 0.432481
ns(dos, df = 10 * trend_df)70 0.0603472 0.1696749 0.356 0.722114

```

```

---
Signif. codes: 0 '***' 0.001 '**' 0.01 '*' 0.05 '.' 0.1 ' ' 1

```

Approximate significance of smooth terms:

```

      edf Ref.df      F p-value
s(sqrt(influ)) 1.03 1.059 14.78 9.19e-05 ***

```

```

---
Signif. codes: 0 '***' 0.001 '**' 0.01 '*' 0.05 '.' 0.1 ' ' 1

```

```

R-sq.(adj) = 0.472   Deviance explained = 47.6%
GCV = 1.081   Scale est. = 0.98971   n = 3632

```
